# Supplementary material
Source: PubMed Central journal article supplement (PMC5812934)
Supplement: AEM.01957-17_zam005188346s1.pdf [file AEM.01957-17_zam005188346s1.pdf]

>FraEKlebsiella\_sp.\_MS\_92-3

LPHIVILATGGTIAGSAASNTQTTGYKAGALGVQTLINAVPEMSKIAHVEGEQVANIGSENMTSDIILQL  
SKRVNALLARDDVDGVVITHGDTLDETPYFLNLTVKSINKPVVFTAAMRPATAISADGPMNLLAEVTVAA  
DPDARGRGVMVVLNDRIGAARFVTKTNATSLDTFRAPEEYGLGVVVGKPKQFETRVDKIHTLRSVFDVRQ  
LKVLPKVVIIIGYQDDPEYMYDAAIAHHDGIIYAGTGAGSVSVRSAAGIKKAQQAGIVVVRASRTGSGV  
VPPDDSQPGLVADSLNPAKARILL

>FraEKlebsiella\_pneumoniae\_subsp.\_pneumoniae\_WGLW1

LPHIVILATGGTIAGSAASNTQTTGYKAGAIGVQTLINAVPEMSKIAHVEGEQVANIGSENMTSDIILQL  
SKRVNALLARDDVDGVVITHGDTLDETPYFLNLTVKSINKPVVFTAAMRPATAISADGPMNLLAEVTVAA  
DPDARGRGVMVVLNDRIGAARFVTKTNATSLDTFRAPEEYGLGVVVGKPKQFETRVDKIHTLRSVFDVRQ  
LKVLPKVVIIIGYQDDPEYMYDAAIAHHDGIIYAGTGAGSVSVRSAAGIKKAQQAGIVVVRASRTGSGV  
VPPDDSQPGLVADSLNPAKARILL

>FraEKlebsiella\_pneumoniae\_subsp.\_pneumoniae\_WGLW3

LPHIVILATGGTIAGSAASNTQTTGYKAGAIGVQTLINAVPEMSKIAHVEGEQVANIGSENMTSDIILQL  
SKRVNALLARDDVDGVVITHGDTLDETPYFLNLTVKSINKPVVFTAAMRPATAISADGPMNLLAEVTVAA  
DPDARGRGVMVVLNDRIGAARFVTKTNATSLDTFRAPEEYGLGVVVGKPKQFETRVDKIHTLRSVFDVRQ  
LKVLPKVVIIIGYQDDPEYMYDAAIAHHDGIIYAGTGAGSVSVRSAAGIKKAQQAGIVVVRASRTGSGV  
VPPDDSQPGLVADSLNPAKARILL

>FraEKlebsiella\_pneumoniae\_subsp.\_pneumoniae\_WGLW5

LPHIVILATGGTIAGSAASNTQTTGYKAGALGVQTLINAVPEMSKIAHVEGEQVANIGSENMTSDIILQL  
SKRVNALLARDDVDGVVITHGDTLDETPYFLNLTVKSINKPVVFTAAMRPATAISADGPMNLLAEVTVAA  
DPDARGRGVMVVLNDRIGAARFVTKTNATSLDTFRAPEEYGLGVVVGKPKQFETRVDKIHTLRSVFDVRQ  
LKVLPKVVIIIGYQDDPEYMYDAAIAHHDGIIYAGTGAGSVSVRSAAGIKKAQQAGIVVVRASRTGSGV  
VPPDDSQPGLVADSLNPAKARILL

>FraEKlebsiella\_oxytoca\_10-5243

LPHIVILATGGTIAGSAASNTQTTGYKAGAIGVQTLINAVPEMSKVARVDGEQVANIGSENMTSDIILKL  
AKRVNELLAREDDVDGVVITHGDTLDETPYFLNLTVKSINKPVVFTAAMRPATAISADGPMNLLAEVTVAA  
DPEAKGRGVMVVLNDRIGAARFVTKTNATSLDTFRAPEEYGLGVIVSGKPKQFETRVDKIHTVRSVFDVRN  
LNALPKVVIIIGYQDDPEYMYDAAIAHHDGIIYAGTGAGSVSVRSAAGIEKAEKAGIVVVRASRTGSGV  
VPVDGGQPGLVADSLNPAKARILL

>FraEKlebsiella\_oxytoca\_10-5250

LPHIVILATGGTIAGSAASNTQTTGYKAGAIGVQTLINAVPEMSKVARVDGEQVANIGSENMTSDIILKL  
SKRVNELLARDDVDGVVITHGDTLDETPYFLNLTVKSINKPVVFTAAMRPATAISADGPMNLLAEVTVAA  
DPQAKGRGVMVVLNDRIGAARFVTKTNATSLDTFKAPEEYGLGVIVSGRPQFETRVDKIHTVRSVFDVRQ  
LSALPKVVIIIGYQDDPEYMYDAAIAHHDGIIYAGTGAGSVSVRSAAGIEKAEKAGIVVVRASRTGSGV  
VPVDDGQPGLVSDSLNPAKARILL

>FraESalmonella\_bongori\_NCTC\_12419

LPHIVILATGGTIAGTAANNTQTAGYKSGELGVQTLINAVPEMSNIARVDGEQVANIGSENMTSDIILKL  
SQKVNALLARDDVDGVVITHGDTLDETAFLNLTVKSINKPVVFTAAMRPASAIASADGAMNLLAEVTVAA  
DPNAKGRGVMVILNDRIGSARFVTKTNATSLDTFKAPEEYGLGVIVNGNPQFETRVEKIHTLRSVFDVRN  
IKKLPNVVIIIGYQDDPEYMYDAAIAHHDGIIYAGTGAGSVSVRSAGIKKAEKAGIIVVRASRTGNGV  
VPLDKGQPGLVSDSLNPAKARILL

>FraESalmonella\_enterica\_subsp.\_enterica\_serovar\_Paratyphi\_C\_str.\_RKS4  
594

LPHIVILATGGTIAGTAANNTQTAGYKSGELGVQTLINAVPEMNNIARVDGEQVANIGSENMTSDIILKL  
SQKVNALLARDDVDGVVITHGDTLDETAFLNLTVKSINKPVVFTAAMRPASAIASADGAMNLLAEVTVAA  
DPNAKGRGVMVVLNDRIGSARFVTKTNATSLDTFKAPEEYGLGVIVNGQPQFETRVEKIHTLRSVFDVRN  
IKKLPNVVIIIGYQDDPEYMYDAAIAHHDGIIYAGTGAGSVSVRSAGIKKAEKAGIIVVRASRTGNGV  
VPLDKGQPGLVSDSLNPAKARVLL

>FraESalmonella\_enterica\_subsp.\_enterica\_serovar\_Enteritidis\_str.\_P125

109

LPHIVILATGGTIAGTAANNTQTAGYKSGELGVQTLINAVPEMNNIARVDGEQVANIGSENMTSDIILKL  
SQKVNALLARDDVDGVVITHGDTLDEYFLNLTVKSDKPVVFTAAMRPASAI SADGAMNLL EAVTVAA  
DPNAKGRGVMVVLNDRIGSARFVTKTNATTLDTFKAPEEYGLGVIVNGKPPQFETRVEKIHTLRSVFDVRN  
IKKLPNVVYIYGYQDDPEYMYDAAIAHHDGIIYAGTGAGSVSVRS DAGIKKAEKAGIIVRASRTGNGV  
VPLDKGQPGLVSDSLNPAKARVLL

>FraESalmonella\_LT2

LPHIVILATGGTIAGTAANNTQTAGYKSGELGVQTLINAVPEMNNIARVDGEQVANIGSENMTSDIILKL  
SQKVNALLARDDVDGVVITHGDTLDEYFLNLTVKSDKPVVFTAAMRPASAI SADGAMNLL EAVTVAA  
DPNAKGRGVMVVLNDRIGSARFVTKTNATTLDTFKAPEEYGLGVIVNGKPPQFETRVEKIHTLRSVFDVRN  
IKKLPNVVYIYGYQDDPEYMYDAAIAHHDGIIYAGTGAGSVSVRS DAGIKKAEKAGIIVRASRTGNGV  
VPLDKGQPGLVSDSLNPAKARVLL

>FraESalmonella\_enterica\_subsp.\_enterica\_serovar\_Typhimurium\_str.\_1402  
8S

LPHIVILATGGTIAGTAANNTQTAGYKSGELGVQTLINAVPEMNNIARVDGEQVANIGSENMTSDIILKL  
SQKVNALLARDDVDGVVITHGDTLDEYFLNLTVKSDKPVVFTAAMRPASAI SADGAMNLL EAVTVAA  
DPNAKGRGVMVVLNDRIGSARFVTKTNATTLDTFKAPEEYGLGVIVNGKPPQFETRVEKIHTLRSVFDVRN  
IKKLPNVVYIYGYQDDPEYMYDAAIAHHDGIIYAGTGAGSVSVRS DAGIKKAEKAGIIVRASRTGNGV  
VPLDKGQPGLVSDSLNPAKARVLL

>FraESalmonella\_enterica\_enterica\_sv.\_Typhimurium\_LT2-4

LPHIVILATGGTIAGTAANNTQTAGYKSGELGVQTLINAVPEMNNIARVDGEQVANIGSENMTSDIILKL  
SQKVNALLARDDVDGVVITHGDTLDEYFLNLTVKSDKPVVFTAAMRPASAI SADGAMNLL EAVTVAA  
DPNAKGRGVMVVLNDRIGSARFVTKTNATTLDTFKAPEEYGLGVIVNGKPPQFETRVEKIHTLRSVFDVRN  
IKKLPNVVYIYGYQDDPEYMYDAAIAHHDGIIYAGTGAGSVSVRS DAGIKKAEKAGIIVRASRTGNGV  
VPLDKGQPGLVSDSLNPAKARVLL

>FraECitrobacter\_rodentium\_ICC168

KPHIMILATGGTIAGTAENKTQTSYKSGELGVQTLINAVPEINTIARVDGQQIANIGSENMTSKIILQL  
SQQVNALLARDDVDGVVITHGDTLDEYFLNLTVKSDKPVVLTGAMRPATAMSADGAMNLL EAVTVAA  
DPNARGRGVMVVLNDRIGSARFVTKTNATTLDTFKAPEEYGLGVMVNGKPPHFEMRVEKVHTLRSVFDVRN  
LRKLPVAVIYGYQDDPEYLYDAAISHHVDGIIYAGTGAGSVSVRSEAGIRKAEKAGIIVRASRTGNGV  
VPVDQGPGLVAGSLNPAKARILL

>FraECitrobacter\_freundii\_GTC\_09629

QPHIVILATGGTIAGTAANTTQTSYKSGEIGVQTLINAVPEIKNIARVDGQQIANIGSENMTSDIILKL  
SQQVNTLLARDDVDGVVITHGDTLDEYFLNLTVKSDKPVVFTAAMRPATAI SADGAMNLL EAVTVAA  
DPNARGRGVMVVLNDRIGSARFVTKTNATTLDTFKATEQGYLGIIVNGTPQFETRVEKVHTLRSVFDVRN  
LRKLPVVVIYGYQDDPEYMYDAAISHHVDGIIYAGTGAGSVSVRSEAGIRKAEKAGIIVIRSSRTGNGV  
VPVDKGPGLVADSLNPAKARILL

>FraEEscherichia\_hermannii\_NBRC\_105704

LPHITILATGGTIAGGGASATQSAYKAGKSVENLVDAVPELKSIAQIKGEQVVSIGSQDMNDQVWLT  
KINSECDSTDGVVITHGDTMEETAYFLDLTVKCDKPVVMVGAMRPSTAMSADGPFNL YNAVITAADPQ  
SARRGVLVAMNDTVLDGRDVTKNTTVDVATFKGVNFGPLGYIHNGKVDYQRT PARKHTTQTPFNVNLT  
LPKVGIVYSYANASDL PVKALVEGGYKGVISAGVGNLYKDVFDLATAAHNGVAVVRSSRVPTGSTTQ  
DAEVDDAKYGFVASGTLNPQKARVLL

>FraEEscherichia\_coli\_str.\_K-12\_substr.\_W3110

LPNITILATGGTIAGGGDSATKSNYTVGKGVENLVNAVPLKDIANVKGEQVNVIGSQDMNDNVWLT  
KINTDCDKTDGFVITHGDTMEETAYFLDLTVKCDKPVVMVGAMRPSTSMSADGPFNL YNAVVTAA  
SANRGVLVVMNDTVLDGRDVTKNTTVDVATFKSVNYGPLGYIHNGKIDYQRT PARKHTSDTPFDVSKLNE  
LPKVGIVYNYANASDL PAKALVDAGYDGVISAGVGNLYKSVFDLATAAKTGTAVVRSSRVPTGATTQ  
DAEVDDAKYGFVASGTLNPQKARVLL

>FraELactobacillus\_vaginalis\_ATCC\_49540

TASALSFMLENLGKPVIVTGSQIPLAELRSDGQINLLNALYVAANYPINEVTLFFNNRLYRGNRTTKAHA  
DGFDAFASPN

>FraESubdoligranulum\_sp.\_4\_3\_54A2FAA

MKRVLMIGTGGTIASEMTGAGLVPELTTDQFLKYVPAVRELCDVTCRQVCNIDSTNMSPAYWLEIARAIR  
EAYSSFDGFVVCHGDTMAYTAAALSYLVQQGPKPIVLTGSQKPINMDITDSKTNLLDSFVCACDGRIPG  
VQIVFGGAVILGTRARKTYSKSFAGFSSINYPVLGVVQDNCLVPYIRPQAQAEPVFDALNSRVALLKLI  
PGASAGQLRFLLDENDAVILESFGVGGVPSGETGEFYEVIRKASAKGKTVVVTTQVQNEGSDLSIYNVGH  
SLKNGLGVLEAFDMTTEAVVAKL

>FraEClostridium\_acetobutylicum\_ATCC\_824

MKKVAVIFNGGTISMKFDSRVKAAVPALSGEEIMSMVTGIEKFAEIESFNFSEEPGPHMTPEKMMELSNF  
IKDILKRDDIVGAVVTHGTDLSLEETAYFLDLTIKNEKPVVVTGSMRNSSELGYDGPANLSAAICTAISEE  
SRNKGVLVCFSDENLASEVTKVHSMHLNAFESPDFGLGIVDTNKPIFYRDKVYNDYIETSSVESKVAL  
IKTAVGMNSDFIDFAVEKGYKGIVIEAMGRGNVPPYMEVIERALKKNVPVVLVSRCYKGRVLDYGYHG  
GGKELRNIGVIFGDNLPGQKARIKL

>FraEClostridium\_symbiosum\_WAL-14163

LKKISVLTGTTIAYTWKNGGPQIGDLTGFDLSLDEVKKEADITVKAFRQKSSSSMVISDIIGLAAEIQS  
LLEGETEGVVVQGTDTIEETAFALEMLLDSEKPVAVTGAMRNPDMRGADGPANLLAAIRTVSCSRREL  
GVMVVFNDAIYPALYVRKIHPQSTEFAAAECGPLGYLAEGKPSIRMKPLQRRIPGLAINKWNVDGKRPDQ  
PVSUPIYAVPVGDDGKLLKCALDCKIDGLVLEAMGGGHTPSELVETLKQLADKMPVVLASRIGRGMMLTG  
TYAGYPGSETSLLSKGLISSGFLDGRKARLLL

>FraEClostridium\_symbiosum\_WAL-14673

LKKISVLTGTTIAYTWKNGVQPQIGDLTGFDLSLDEVKKEADITVKAFRQKSSSSMVISDITGVAAEIQS  
LLEGETEGVVVQGTDTIEETAFALEMLLDSEKPVAVTGAMRNPDMRGADGPANLLAAIRTVSCSRREL  
GVMVVFNDAIYPALYVRKIHPQSTEFAAAECGPLGYLAEGKPSIRMKPLQRRIPGLAINRWNVDGKRPDQ  
PVSUPIYAVPVGDDGKLLKCALDCKIDGLVLEAMGGGHTPSELVETLKQLADKMPVVLASRIGRGMMLTG  
TYAGYPGSETSLLSKGLISSGFLDGRKARLLL

>FraEClostridium\_sp.\_7\_3\_54FAA

MKNISVLTGTTIAYTWKNGVQPQIGDLTGFDLSLDEVKKEADITVKAFRQKSSSSMVISDITGLAAEIQS  
LLEGETEGVVVQGTDTIEETAFALEMLLDSEKPVAVTGAMRNPDMRGADGPANLLAAIRTVSCSRREL  
GVMVVFNDAIYPALYVRKIHPQSTEFAAAECGPLGYLAEGKPSIRMKPLQRRIPGLAINKWNVDGKRPDQ  
PVSUPIYAVPVGDDGKLLKCALDCKIDGLVLEAMGGGHTPSELVETLKQLADKMPVVLASRIGRGMMLTG  
TYAGYPGSETSLLSKGLISSGFLDGRKARLLL

>FraECollinsella\_aerofaciens\_ATCC\_25986

MKRILLIATGGTIASTEDGNGLSPALTGEELAQSVPEISGLCKLDVVQPMNIDSTNMRPDWMRIRDVVV  
KGYADHDGFVILHGTDTMSYTAALSYLIQDSPKPIVLTGSQKPMGNPFTDAKLNLYQSLLYALDENSHD  
VSIVFGGVAIAGTRARKQRTMSFNAFISVNYPPIAYIRNDRIVRNLHGTHQGENPVRFYDSIDPRVFL  
KLTPGVNPGILDALADSYDAVILETFGIGGIPEFGESGESFQEAIFRWVDSGRTVVMTTQVPEEGLDLGV  
YEVGRAYADHPGILRGDDMTTETLVAKT

>FraEClostridiales\_butyrate-producing\_bacterium\_SS3/4

MKHLLLLGTGGTIAACKRGENGLTPLLTDGDELLSYVPDAKKFCEVETVQVLNIDSTNMHPKHWLKLAQVLE  
ENYDDYDGFVICHGDTMAYTAAAMSYLVQHSSKPIVITGAQKPIDLDVTDARTNLLDSLRFASERAHG  
VTIVFDGKVIAGTRGKRSAAARATTPSPASTSR

>FraEClostridium\_sp.\_M62/1

MKKLLLLSTGGTIASVMTENGLAPAATPKELLSYIPEAGKFCEISVRQLFNLDSTNFQPEHWIRISEEIR  
REYEVYDGFIVTHGDTMAYTAAALSYLIQNPEKPIILTGSQKPIVITDARKNLMDSLRFASRDGVRG  
VYLVFDGKAILGTRARKIRSKSYSAFESINYPVAAFIDENRIIQYVDGESRTGETVFYDRLNPRVFLKL  
IPGIEPEILQYIGERYDAIIIESYGVGGIPFYNKRNFSLGLEDLTEKGKIVVIATQVMLEGSDAEVYEVG  
YRAVNHYNVLQAYDMTVEAAAVKL

>FraE0ribacterium\_asaccharolyticum\_ACB7

MKKLLLLIGTGGTIASTRETGDGLSPGLQAEIIVSFVPEVRNLCEIEVLQLCNIDSTNMNPKIWRVQLVQAIK

ENFDRYDGFVVLHGTDTMAYTSAVLSYMIQHSRKPIVVTGSQKPIDREGTDARVNLRDSILYAMDDYSEN  
VVLIFDGNVIAGTRAKKMQARSFNAFQSVNFPVLARVQDGRIIRYLPYIPEREVPRFFTEISDSVCFKL  
IPGTRPELLSYLFENYDCIVIESFGVGGIPDALLDTVYREMKNWKESGKVLVMATQVMNEGSNMEIYRVG  
QKIKKDFQLIEAYDMTLEAVVTKL

>FraE0ribacterium\_sp.\_oral\_taxon\_108\_str.\_F0425

MKRIILLGTGGTIACKRTDKGLKPVITPDEILSYVPDSQSYCEIHSIQLMNIDSTNIQPCHWLAIEQAIE  
ENFDRYDGFVVLHGTDTMAYTSAVLSYMIQHSRKPIVVTGSQKPIDREGTDARVNLRDSILYAMDDYSEN  
VVLIFDGNVIAGTRAKKMQARSFNAFQSVNFPVLARVQDGRIIRYLPYIPEREVPRFFTEISDSVCFKL  
IPGTRPELLSYLFENYDCIVIESFGVGGIPDALLDTVYREMKNWKESGKVLVMATQVMNEGSNMEIYRVG  
QKIKKDFQLIEAYDMTLEAVVTKL

>FraEClostridium\_bolteae\_90A9

MKRILLGTGGTIACKRTDKGLKPVITPDEILSYVPDSQSYCEIHSIQLMNIDSTNIQPCHWLAIEQAIE  
ENYARYDGFVITHGTDTMAYTAAALSYLIQHSPKPIIITGAQKPIDMENTDARTNLADSLFASCPGAHD  
VNIVFDGKVIAGTRGKKEWTKSYHAFSSINFPYVAIIQDGQIIFYLDDKDRDKKPVCFYRQMDGDVGLMK  
LIPSMASLLDYMAEHYDAVIESFGVGGLPYQGDYHGAIARWTGLGKTVMITTTQVTNEGSMSVYEV  
GRSIKQEFGLLEAYDMTLEAVVTKI

>FraEClostridium\_bolteae\_90B3

MKRILLGTGGTIACKRTDKGLKPVITPDEILSYVPDSQSYCEIHSIQLMNIDSTNIQPCHWLAIEQAIE  
ENYARYDGFVITHGTDTMAYTAAALSYLIQHSPKPIIITGAQKPIDMENTDARTNLADSLFASCPGAHD  
VNIVFDGKVIAGTRGKKEWTKSYHAFSSINFPYVAIIQDGQIIFYLDDKDRDKKPVCFYRQMDGDVGLMK  
LIPSMASLLDYMAEHYDAVIESFGVGGLPYQGDYHGAIARWTGLGKTVMITTTQVTNEGSMSVYEV  
GRSIKQEFGLLEAYDMTLEAVVTKI

>FraEClostridium\_clostridioforme\_90A7

MKRILLGTGGTIACKRTDKGLKPVITPDEILSYVPDSQSYCEIHSIQLMNIDSTNIQPCHWLAIEQAIE  
ENYARYDGFVITHGTDTMAYTAAALSYLIQHSPKPIIITGAQKPIDMENTDARTNLADSLFASCPGAHD  
VNIVFDGKVIAGTRGKKEWTKSYHAFSSINFPYVAIIQDGQIIFYLDDKDRDKKPVCFYRQMDGDVGLMK  
LIPSMASLLDYMAEHYDAVIESFGVGGLPYQGDYHGAIARWTGLGKTVMITTTQVTNEGSMSVYEV  
GRSIKQEFGLLEAYDMTLEAVVTKI

>FraEClostridium\_bolteae\_ATCC\_BAA-613

MKRILLGTGGTIACKRTDKGLKPVITSDEILSYVPDSQSYCEIHSIQLMNIDSTNIQPCHWLAVEKAIE  
ENYSQYDGFVITHGTDTMAYTAAALSYLIQHSPKPIIITGAQKPIDMENTDARTNLADSLFASCPGAHG  
VNIVFDGKVIAGTRGKKEWTKSYHAFSSINFPYVAIIQDGQIIFYLDDKDRDKEPVCFYRQMDGDVGLMK  
LIPSMASLLDYMAEHYDAVIESFGVGGLPYQGDYHGAIARWTGLGKTVMITTTQVTNEGSMSVYEV  
GRSIKQEFGLLEAYDMTLEAVVTKI

>FraEClostridium\_bolteae\_90A5

MKRILLGTGGTIACKRTDKGLKPVITSDEILSYVPDSQSYCEIHSIQLMNIDSTNIQPCHWLAVEKAIE  
ENYSQYDGFVITHGTDTMAYTAAALSYLIQHSPKPIIITGAQKPIDMENTDARTNLADSLFASCPGAHG  
VNIVFDGKVIAGTRGKKEWTKSYHAFSSINFPYVAIIQDGQIIFYLDDKDRDKEPVCFYRQMDGDVGLMK  
LIPSMASLLDYMAEHYDAVIESFGVGGLPYQGDYHGAIARWTGLGKTVMITTTQVTNEGSMSVYEV  
GRSIKQEFGLLEAYDMTLEAVVTKI

>FraEClostridium\_bolteae\_90B7

MKRILLGTGGTIACKRTDKGLKPVITSDEILSYVPDSQSYCEIHSIQLMNIDSTNIQPCHWLAVEKAIE  
ENYSQYDGFVITHGTDTMAYTAAALSYLIQHSPKPIIITGAQKPIDMENTDARTNLADSLFASCPGAHG  
VNIVFDGKVIAGTRGKKEWTKSYHAFSSINFPYVAIIQDGQIIFYLDDKDRDKEPVCFYRQMDGDVGLMK  
LIPSMASLLDYMAEHYDAVIESFGVGGLPYQGDYHGAIARWTGLGKTVMITTTQVTNEGSMSVYEV  
GRSIKQEFGLLEAYDMTLEAVVTKI

>FraEClostridium\_bolteae\_90B8

MKRILLGTGGTIACKRTDKGLKPVITSDEILSYVPDSQSYCEIHSIQLMNIDSTNIQPCHWLAVEKAIE  
ENYSQYDGFVITHGTDTMAYTAAALSYLIQHSPKPIIITGAQKPIDMENTDARTNLADSLFASCPGAHG  
VNIVFDGKVIAGTRGKKEWTKSYHAFSSINFPYVAIIQDGQIIFYLDDKDRDKDPVCFYRQMDGDVGLMK

LIPSMASLLDYMAEHYDAVIIIESFGVGGLPSYQGDYHGAIARWTGLGKTVMITTTQVTNEGSDMSVYEV  
GRSIKQEFGLLEAYDMTLEAVVTKI

>FraEClostridium\_clostridioforme\_2\_1\_49FAA

MKRILLLGTGGTIACKRTDKGLKPVITSDEILSYVPDSRSYCEIHSIQLMNIDSTNIQPCHWLAVEKAIE  
ENYGQYDGFVITHGDTMAYTAAALSYLIQHSPKPIITGAQKPIDMENTDARTNLADSLFASCPGAHD  
VNLVFDGKVIAGTRGKKEWTKSYHAFSSINFPYVAIIQDGQIIFYLDDKDRDKKPVCFYRQMDGDVGLMK  
LIPSMASLLDYMAEHYDAVIIIESFGVGGLPSYQGDYHGAIARWTGLGKTVMITTTQVTNEGSDMSVYEV  
GRSIKQEFGLLEAYDMTLEAVVTKI

>FraEClostridium\_clostridioforme\_90A8

MKRILLLGTGGTIACKRTDKGLKPVITSDEILSYVPDSRSYCEIHSIQLMNIDSTNIQPCHWLAVEKAIE  
ENYGQYDGFVITHGDTMAYTAAALSYLIQHSPKPIITGAQKPIDMENTDARTNLADSLFASCPGAHD  
VNLVFDGKVIAGTRGKKEWTKSYHAFSSINFPYVAIIQDGQIIFYLDDKDRDKKPVCFYRQMDGDVGLMK  
LIPSMASLLDYMAEHYDAVIIIESFGVGGLPSYQGDYHGAIARWTGLGKTVMITTTQVTNEGSDMSVYEV  
GRSIKQEFGLLEAYDMTLEAVVTKI

>FraEClostridium\_clostridioforme\_90A1

MKRILLLGTGGTIACKRTDKGLKPVITSDEILSYVPDSRSYCEIHSIQLMNIDSTNIQPCHWLAVEKAIE  
ENYGQYDGFVITHGDTMAYTAAALSYLIQHSPKPIITGAQKPIDMENTDARTNLADSLFASCPGAHD  
VNLVFDGKVIAGTRGKKEWTKSYHAFSSINFPYVAIIQDGQIIFYLDDKDRDKKPVCFYRQMDGDVGLMK  
LIPSMASLLDYMAGHYDAVIIIESFGVGGLPSYQGDYHGAIARWTGLGKTVMITTTQVTNEGSDMSVYEV  
GRSIKQEFGLLEAYDMTLEAVVTKI

>FraEClostridium\_clostridioforme\_90A3

MKRILLLGTGGTIACKRTDKGLKPVITSDEILSYVPDSRSYCEIHSIQLMNIDSTNIQPCHWLAVEKAIE  
ENYGQYDGFVITHGDTMAYTAAALSYLIQHSPKPIITGAQKPIDMENTDARTNLADSLFASCPGAHD  
VNLVFDGKVIAGTRGKKEWTKSYHAFSSINFPYVAIIQDGQIIFYLDDKDRDKKPVCFYRQMDGDVGLMK  
LIPSMASLLDYMAGHYDAVIIIESFGVGGLPSYQGDYHGAIARWTGLGKTVMITTTQVTNEGSDMSVYEV  
GRSIKQEFGLLEAYDMTLEAVVTKI

>FraEClostridium\_clostridioforme\_90A4

MKRILLLGTGGTIACKRTDKGLKPVITSDEILSYVPDSRSYCEIHSIQLMNIDSTNIQPCHWLAVEKAIE  
ENYGQYDGFVITHGDTMAYTAAALSYLIQHSPKPIITGAQKPIDMENTDARTNLADSLFASCPGAHD  
VNLVFDGKVIAGTRGKKEWTKSYHAFSSINFPYVAIIQDGQIIFYLDDKDRDKKPVCFYRQMDGDVGLMK  
LIPSMASLLDYMAGHYDAVIIIESFGVGGLPSYQGDYHGAIARWTGLGKTVMITTTQVTNEGSDMSVYEV  
GRSIKQEFGLLEAYDMTLEAVVTKI

>FraEClostridium\_clostridioforme\_90A6

MKRILLLGTGGTIACKRTDKGLKPVITSDEILSYVPDSRSYCEIHSIQLMNIDSTNIQPCHWLAVEKAIE  
ENYGQYDGFVITHGDTMAYTAAALSYLIQHSPKPIITGAQKPIDMENTDARTNLADSLFASCPGAHD  
VNLVFDGKVIAGTRGKKEWTKSYHAFSSINFPYVAIIQDGQIIFYLDDKDRDKKPVCFYRQMDGDVGLMK  
LIPSMASLLDYMAGHYDAVIIIESFGVGGLPSYQGDYHGAIARWTGLGKTVMITTTQVTNEGSDMSVYEV  
GRSIKQEFGLLEAYDMTLEAVVTKI

>FraEClostridium\_clostridioforme\_90B1

MKRILLLGTGGTIACKRTDKGLKPVITSDEILSYVPDSRSYCEIHSIQLMNIDSTNIQPCHWLAVEKAIE  
ENYGQYDGFVITHGDTMAYTAAALSYLIQHSPKPIITGAQKPIDMENTDARTNLADSLFASCPGAHD  
VNLVFDGKVIAGTRGKKEWTKSYHAFSSINFPYVAIIQDGQIIFYLDDKDRDKKPVCFYRQMDGDVGLMK  
LIPSMASLLDYMAGHYDAVIIIESFGVGGLPSYQGDYHGAIARWTGLGKTVMITTTQVTNEGSDMSVYEV  
GRSIKQEFGLLEAYDMTLEAVVTKI

>FraEClostridiales\_bacterium\_1\_7\_47FAA

MKRILMLGTGGTIACKRTERGLKPVITSEEILSYVPDSRSTYQCIDTIQILNIDSTNIQPShwLTIASAIE  
AHYDQYDGFVITHGDTMAYTAAALSYLIQHSHKPIVITGSQKPIDMENTDARTNLADSLRFASDPRAHD  
VNIVFDGKAIAGTRGKKERTKSYNAFSSINFPNVAIIQEDHIIIFYLDDKDRSTEPVRFHEDSNVGLMK  
LIPSTDTSLDYMAGHFDALIIIESFGVGGLPSYEKGDYRAIGHWTGRGKTVMITTTQVTNEGSNMSVYEV  
GRNIKQEFGLLEAYDMTLEAVVTKT

>FraEClostridium\_asparagiforme\_DSM\_15981  
MKHILMLGTGGTIAACKRSDAGLKPVITSEEILSYVPDSKRYCDIDSLQVFNIDSTNMQPSHWLAVARAIE  
EHYDRYDGFVICHGDTMAYTAAALSYLVQDSPKPIVITGAQKPIDMENTDARTNLADSLFFASNDRAHG  
VNIVFDGKVIAGTRGKKERTKSYNAFSSINFPYIAAIQEDHILFYLDKPEHAQVKFYHEMSSGVVLLKL  
IPSMASLLDYMAEHYDAVIVESFGVGGGPSYDSGDYYRAVGRWTALGKTVVMTTQVTNEGSNMSVYEVG  
KNIKQEFGLLESYDMTLEATVTKI

>FraEClostridium\_hylemonae\_DSM\_15053  
MKKVLLLATGGTIAARRGRQGLAPDINCGDFLDMIPEMKNFLIESRDILNLDSSNIQPEEWQYIAGIVT  
QALSDFDGVIIHTGDTMAYTASALSYMLQNLKKPVVLTGAQIPIEQMFTDARRNLQTAAFAAVEAGIPKV  
MVAFFDDKIINGCRATKVRTLGFNAFESISANYLGEVYADGVHLYDNYKVVHTEEKPFCLKENLCPNVFLL  
KLIPGTNPDIFECLLMGYRGIVIEAFGAGGTHFERRNLIPKLLKLDHGVSIVARSQCLYEKSDFSLYE  
VGRKLLDCGVIPGRDMTTEAIVTKL

>FraEClostridium\_hathewayi\_WAL-18680  
MKRILMIATGGTIAASKRDVNLKPLITSEEILSYVPDTREFCQTDTLQLFNIDSTNIQPMHWLAMANAIE  
ERYMEYDGFVICHGDTMAYTAAALSYLIQNSRKPIVITGAQKPIDMEITDAKTNLSDSLLFASHDSAYG  
VSIVFDGKVIAGTRGKKERTKSYNAFSSINFPYIASVQDSRVIFYLDDKNQLDEPVTFYHKLNSNVALLK  
LIPSMDATVLDYMAGHYDAVIESFGVGGGPSYETGAYHPVVEKWVSLGKTVVMTTQVTNEGSNMSVYEV  
GHSIKQEFGLLEAYDMTLEATVTKL

>FraELachnospiraceae\_bacterium\_oral\_taxon\_082\_str.\_F0431  
MKKILVIGTGGTIAASKQMGEGSPALSAPEILTYVPEVEKLCEIDVLQICNIDSTNITPKIWDIAGTIK  
KIYDFYDGFVILHGTDTMAYTSAALSYMIQNSRKPIVITGAQKPINIDGTDKVNLRDSILYACDDYSQN  
IVLVFDGNVIAGTRAKMMARSFNAFHSVNFPIIARIQEKHIIRYIPYIPMRERVRFFLDLNDSDVCLKV  
IPGMREGMLEYLFENYDCIVIESFGVGGIPDNVLEKFYAEMEKWQKMGKFIVMATQVVNEGSNMEIYQVG  
QKVKKDFNLIEAYDMTLEATVTKM

>FraEClostridium\_hathewayi\_12489931  
MKKILMLGTGGTIAACKRGESGLKPLISSEELLSYVPDAKQFCQADSLQILNIDSTNMQPKHWLTMAEAEIE  
AHYEEYDGFVICHGDTMAYTAAALSYLIQNSPKPIVITGAQKPIDMENTDARINLSDSLRFASDDRSCG  
VTIVFDGKAIAGTRGKKERTKSYNAFSSINFPYIAMIQDGHVIFYLDEKEHLTDHVQFYRTLNPVALLK  
LIPSMGADVLDYMAGHYDAVIESFGVGGGPSYDSGDFYKAIEKWISLGKTVVMTTQVTNEGSNMSVYEV  
GRSIKKEFGLLEAYDMTLEATVTKL

>FraECoprococcus\_comes\_ATCC\_27758  
MKKILMLGTGGTIASRQTKDGLAPGLTPEDILSYIPAVKNVCEVQTKQVCNLDSTNVTPHVKMMVKAVE  
DNYAYYDGFVICHGDTLAYTAAALSYMIQNSAKPIVVTGAQKPINMDVTDKTNLLDSFIYAADDDSQG  
VNLVFDGKVIIVGTRAKKEHAKSYNAFSSINFPYLAVIQDGLVRYIPEIPCRHAVKFYYDMKDSVYVLLK  
IPGMKPDILSYLFEHYDCLVIESFGVGGIPQTLVQEFYQEMEKWSGKGFVVMTTQVANEGSNMTVYEVG  
KLSRISI

>FraEEnterococcus\_faecium\_R497  
MKKILVLHTGGTIAMKENMLTGGVSPDVANPLLDAAEITIPKHVELLVEDIFNLSPHIMP SHMLVLKERI  
LSAYASGISGVVITHGDTLEETAFFLDTTIGNKLPVLTGAMRSSNELGSDGLYNFESAIRVASCEEAL  
DKGVLVVMNDEIHSARYVTKHTTNVATFRTPTLGPVGLVTKNRILFLQELLETKRLDISAVDGTIPIVK  
AYAGMQGDLEAIAHTKVDGLVIEALGAGNLPQALAALAEKLLVQKIPVVLVSRFCFNGIAEPVYDYEGGG  
KELEKMGIIFCNSINSQKARLKL

>FraBLM\_ORIG\_scaffold\_17  
MNRPEELIKKIYEEQGRINDVFLTACGGSLVDLYPGYYFLNAESETMHAHWLTAKELVVSPSKFLKKGAL  
VILCSHGNTGETVEAARLAKEHGAAIITMTHNPESICAREEMNPVVYSWEDDTNEKDRPQGIVMRVLNE  
LLKMQEESYSKYDAVLDGLEKADGIVRAAVKVKVNRWTWVFAEKYFEFPFLYIMGSGASYSQAYGFSICSL  
QEMQWMDCCYLHSGEYFHGPFECTDEDHLYILLMGTGAARTMDERALVFLKKYAKKYEVIDAVELGIDAI  
DASVNEYFCPMVYAMSVAYRTGLQDKRRHPLDMRRYMGVVEY\*

>FraBLM\_ORIG\_scaffold\_39

MIKGMQEVIDVMARVKSDDLKNGGLKQVVFVACGGSFASSYPARFLLNQESALRVQGYNSSEFVYATPKN  
IDKNTLVIGTSTKATAETVEALKKAKEKGAFTVGLSGYADSLTAQTADYYITYYHADEWYQDPTLIHYS  
QGTALKIAFWLLREYDRYAAYDMAMEGFLEAIYAGAYQSVKADAARFGMTYKDDQVWVMSSGAWEV  
SYSDAFCFFQEMQTVHCVPIHSGEYFHGAFETCEKDLAILLFSIGRTRPVDERAERFLNQFGGHHWIMD  
ARDFGLDGLDERVAEYFNSLLFHPLSKQFITAMADVRMHPMGYRRYMWKFDY\*

>FraBLM\_ORIG\_scaffold\_211

MNKTVKEIIAEIKEKTDARGGLKHVYFVACGGSKAAIFPGLYLLQSEARTFSATTYTSNEFVHATPKELD  
GRCVAVICSLKATAETVEAVKTANQAGALTIAMTGSMETGMAQVQYVVVTSNGDDQVYSDSNQANSLRI  
GFELLHQIEGWEHYDKAMEAYSHIDQIVAEKGESCLPAARAWAEKVKDEPVFVYVLASGPNYGVAYSMMM  
HFMEMQWKHAVCLHTGEYFHGPFETTDKALPMVLLMSEGRTRALDERCLKFLNTYGENFIIIDFQELNKG  
RIHPSVVEFFNPVMIPIERYYSQMAELRGHSMDERRYMWKVEY\*

>FraBLM\_ORIG\_scaffold\_458

MIMKQEHMDQIGVAVKAVAAKDDINHFYFVACGGSQAFMMPAQYMFDRERAIIPASIISSNEFVHRLPKAL  
GPDSVVITCSHSGNTPETVKATEIAREKGATTIALSNLVDSPWKAAYPIHYDWGKEADASDLNKAVLY  
SLIFGILNTVAPCDKYEKGIASVENINEVIEKAKAQYADTVKGGWKKYKREKLIYTMGSGACYGETYSFA  
ICLLMEMQWIHSSCIHSGEYFHGPFVETDFDVPFIIIVKGLGATRPLDERAHNFCQKYSNIMLVDCEFTD  
MTGIDEEVREYFAPLVAGAVLRSLADAFAYERGHDLGVRRYMWKMEY\*

>FraBLM\_ORIG\_scaffold\_551

MEIRDLMEKIIKDMAAGGIKNVWVAAGGSHDGHYAAQYFMDRESTAVRSQMITSSSEFVYAPPKNVKGK  
TIVVLTSMRGTKETIEAAKVAKELGAVTVSQQYVDESGLTEVCDYNVQYISIWEDDRDQSRNAGNALRMA  
MAIVDIVEGYADYADAMDAFAKVQPAYIKAREYCAPLAVKWAAQAKDEKCITVLASGPAYGSGHIFSTCN  
ILEMLQIHSPTFNSCDFHGPFEITDKNQSFLLIADGRTRKADERAITFVKKYAGDKVYILDAKELGLD  
NLKDSVSEYFNHLLFTPVLNNVYMKELSKATGIDYTTTRYMWKVEY\*

>FraBLM\_ORIG\_scaffold\_593

MTMTVKEIVGEIKEKLERAGGLKHVYFVACGGSKAAIFPGLYLLQSEARTFGATTYTSNEFVHAAPKELD  
SRCLAVICSLKATPETVEAVRTANAAGAVTIAMTGSMETGMAKVQYVVVTSNGDEQVYSDSNQSNALRI  
GFELLHQIEGWKDYEKAMAAYAQIDAIVAEGKERCLAERSWAKEYQDEPIFYVLASGPNYGVAYSMMM  
HFMEMQWKHAVCLHTGEYFHGPFETTDALPMVLLMSEGRTRPLDERCLRFLEQYAENYITIDFQELNAG  
RIDPEVAEFFNPVLIPIERFYVAQMAELRGHSMDERRYMWKVPY\*

>FraBLM\_ORIG\_scaffold\_634

MEPKQIIIEAIKKEVPAAKSVYFVCGGASKAELYPGKYFLEANARNIRVGHYTANEFYATPVAVDETAIV  
VTCSLGGTTPETVAASKKAMD LGAKVAVTHVDGSP LAKNAHYVVLHGFEKNYAAKLEKMTKVL SLAVEI  
LHQYEGYDRYDDMQTAFGKIYDLIEKAVSFVVPAAKNFAEDYKDAPVVYVMSSGATQEVAYAFSICLLME  
MQWVNSGSFHDGEFFHGPFEIVEKDVPFILLMNEGRTRALDSRALDFLNRFAQKTTVLDGKDFGLASEVP  
ASVAEYFNPMVLSAVLRVYAEQLAIKRNHPLTQRRYMWKLEY\*

>FraBLM\_ORIG\_scaffold\_1033

MNAKAVIEGILKEKGTQVQYVWVACGGSLIDLPAHFMLNAESATVESGWYTSKEFVLSTPKKLGKDSMV  
VVC SHGNTQEA VDAAILAKEAGAAVITLTDGKGSKCDDERFIAWYYPWGEVPTAEVPSGITLLLAAEL  
LKAQEGFDKYDALCDGIQKMDGIVAAAKVKVNAEMGEAFKACQENSFFYILGSGATFSQTYGFAICSLM  
EMQWQNCAYIHSGEYFHGPFVETENGVFYFLQMGSGACRPMDERALFLKTHTDRLMVLDA LDHGMDAVD  
AGVRDYLDVLFYAMNVELRAARGRVFDHSPDIRRYMGIETY\*

>FraBLM\_ORIG\_scaffold\_1182

MKYEAKAWKETQGPLRNFDQKQIDS VNGALALRPQIESIIDRIWEDGFDGIYFAGIGGTYASGMQAEV  
YMRGRSSLPVFVENAAEFLTTGNKRFTKSVVIYSSVSGNTSEMVLVERVREIGARIFAFIDTPGSVLT  
QPDKQDYLVVYPMNEQLKFYMVANYLMYKNGEFAEYERYNKEMEAHLAQAQAQVEKDADAWAYEYAKNKV  
AFLNGHRDLPHYFIGSGNQYGATYSYAMCYWEEQMWIRTKSISCQEFFHGMQEIIVADTPVTLFMGEDEQ  
RPLAERVAKFLPRVNANYTIIDTKEHELKGISPEFRGTISHLVMHG VNNRVDAYMELFLRHPLSIRRYR  
QFEY\*

>FraBLM\_ORIG\_scaffold\_2447

MIKGMQEVIQVMEQAKAALEANGGLNQVVFVACGGSLASSYPARYLLNQESSLRVQGYNSSEFVNATPKS

VDKHTLVIATSTKATPETVEAIKAANAKGAVTIGLSGYADSLTAQSANYYYITYYHADEWYQDPTLVHCNS  
QGTALKIAFWLLKEYDNYASYDKALEAFEKMPQLYQAYQSVKADAAKFAMAYKDDAVWNVMSGAAWEV  
AYSDAFCFFQEMQTVHCVPIHSGEYFHGAFETCDKDLAILLFKSVGRTRPLDDRAEHFLEKFGGHHWIID  
AKELGLDQLDESVAEYFNAMMMHPISKQFISAMGDVRMHPMSYRRYMWKFEY\*

>FraBLM\_ORIG\_scaffold\_2639

MTIQEIVATIKAKQPEIKTVYFVCGGASMSDLFPAKYFLENNAKLRTSIYTANNFNYSTPAAVDNTSIV  
ITCSLSGNTPETVAATKLAVEKGAHVISITINAESGLAKNSQYQIIHGFYESYGAKMEKPARALELACEI  
LNEYEGYEHYDDLHDGLNKIFDLINTSAPLFRSTARKFAEENYNAPILYVMSSGATQYTAYGFSMFLMME  
MQWLESSTFHTGEFFHGPFEADENAHYVLMNDGPTPLDARALTFIQRMNAKYTLIDAKDFGLSSH  
STVVEYFNPLMIGGLTRLLGEEIAIKREHPLTMRRYMWKLEY\*

>FraBLM\_ORIG\_scaffold\_3412

MSYTGSDMKSIIGEILEKKAADGGVKSIFYVCGGSLGALYPAKSFMERESADIKCALISSNEFVHSTPK  
DFGKNSVICLACHKGNTPETIAAARLGKEKGAAVIILTWEQSEIVAYGDYVVCYAFDASPDLAGDIDY  
GQEKTVCALLVAVELLEQTSGYENYDKFMAGREMLTSVIRNARAHVAKRALAFAEEYKDDSVIYTMGSGA  
GYGAAYMESICIFMEMQWLDSSSIHTGEYFHGPFEITDENRPFMIQVSEGSTRPLDERCLNFLRNYAKRI  
EVLDAKELGLSVIDPAVVDFNHSLFNNVYPIYNHALAEARKHPLPTRRYMWKVEY\*

>FraBLM\_ORIG\_scaffold\_4469

MFYTSANMRDIIGEILAAKKEQGGVKSIFYVCGGSLGALYPAKTFMEREKAGIKSALISSNEFVHSTPR  
DFGKNSIICLACHKGNTPETIAAARLGREKGAAVIVLTWEQSEIVEHSDYTVLYSFDASPDLAGDIDY  
AGEKTMCALLVAVELLQQTAGYENYEKFLAGREMLTAVIRKARAQVAKRALAFAQEYKDDSVIYTMGSGA  
GYGAAYMESICIFMEMQWLDSSSIHTGEYFHGPFEITDVNRPFMIQVSEGSTRPLDERCLKFLRTYKRI  
EVLDAKELGLSVIDPAVVDFNHSLFNNVYPIYNHALAEARKHPLPTRRYMWKVEY\*

>FraBLM\_ORIG\_scaffold\_4493

MNAKTVIEEILKEKGSIKQVYVWACGGSLIDLYPAHFMAESATIESGWYTSKEFILSTPKKLGNLSLV  
VMCSHSGNTQESVDAAVLAKEAGASVIALTDGKGSKSDPRFIAWVYPWGDGVPTSEVPSGITLLAAEL  
IKAQEGFDKYDALCDGIKKMDGIVAAAKTKVNAELGDAFAKACQDNKFFYILGSGANFSQTYGFAICSLM  
EMQWQNCYSIHSGEYFHGPFEVTENGVFYFLQMGSGKCRPMDERALAFLKTHDRLMVLDTLEYGMDAVD  
LSVRDYLDSVLLYAMNVELRAARGKVFHDSPDIRRYMGIEKY\*

>FraBLM\_ORIG\_scaffold\_6500

MNQTVKEIIAEIKQALEAKGGLKHVYFVACGGSKAAIFPGLYLLQSEAKTFGATTYTSNEFVHATPKELD  
ERCIavicSLKATPETVEAVKTANAAGAVSIAMTGSMTGMAKVGQYVVTYSNGDDQVYSDSNQSNLSRI  
GFELLHQFEGWANYDKAMDAYAQLDAMIDEAKQELLPAAQAWAAKVKDEPVFVVLASGSNYGVAYSMTCC  
HFMEMQWKHAVCLHTGEYFHGPFEETDKQLPMLILLMGEGRTRALDERCLKFLQTYAENFITIDFAKINKG  
RIDPSVVEFFNPVVMIPVERYYSQMAELRGHSMDEIRRYMWKVEY\*

>FraBLM\_ORIG\_scaffold\_6921

MVTFDENKILSNGEYIYKQRAEIERIADCVCCKGFENLLFTSSGGLAMMQPFDYMISAMSGMEVCSQVA  
GDLLLGTGNRLTEKTLVFMASKSGDTKETVEAARYVKERGAIVSVLGVEDSPLGELSTYSVVFKNRPO  
ELVLLLLIGRILYRKGFDDYMQFADELGNLPAALVSVGKASDLKAREYALKYKDAPYQIWIWISGNLWGP  
VYSFAMCVLEESLWMRTKSVSSPEFFHGTIELMEKGVCVLALAMTEGPTPLDERVKKFILKYGEQVTVFD  
TADYQLPGISDRFRWMLSPVVINAVLSRISKNEEMKAHSLEIRRYRRVDY\*

>FraBLM\_ORIG\_scaffold\_6947

MKQEHIDQINVAVKAVAEEKKNINHFYFVACGGSQAFMMPAQYMFDRDIATPASIYTSNEFVHRAPKALGP  
DSVVITCSHSGNTPETVKATEVARAKGATTIALSHLVDSPLWKAAYPIHYDWGKEADASDLNKAVLYSL  
IFRILNAVAPCEKYEKGIASVENINDVIEKAKTQFADTVKAWGKYYKRELIYTMGSGACYGEAYSFAIC  
LLMEMQWIHSNCIHSGEYFHGPFEVTFDFVPFIIVKGLGATRPLDERAYNFCQKYSDSIMLVDCETFDMT  
GIDQEVREYFAPLVAGAVLRSLADAFAYERGHDLGVRRYMWKMEY\*

>FraBLM\_ORIG\_scaffold\_8780

MFNFDEAKIRQEHQNGVDIIHQVEKHVDQVCKDGYSGIFYIGIGGTVLYANQMMHIAKQLGSKLPLYIEN  
AADFNLVGNPFDEKSVVIESISGDTREVVEAVDKAHAAGARVIGYVEKEGTPLYEKSDYLVTTVGGGY  
YFWYTVTLRFLKNAGQFEKYDQFFKEIVHMPDNVQIYKDADEDARAYAKEYCDEPITYLVGSGNLEDWA



TCYGMCIMEEMQWMRTRPISAAFFHGTLEVIERDIPVILIKGEDMTRPQMERVEKFVNTISAKVTVFDT  
KNFKLKGISDEFRGLAPIVMRSFQRVNVHLEHCRRHPLAIRRYRRLDY\*

>FraBLO\_ORIG\_scaffold\_34

MIKGMQEVIDVMARVKSDDLKNGGLKQVVFVACGGSFASSYPARFLLNQESALRVQGYNSSEFVYATPKN  
IDKNTLVIGTSTKATAETVEALKKAKEKGAVTVGLSGYADSLTAQTADYYITYYHADEWYQDPTLIHYN  
QGTALKIAFWLLREYDRYAAYDMAMEGFEKLEAIYAGAYQSVKADAARFGMTYKDDQVWVMSSGAWEV  
SYSDAFCFFQEMQTVHCVPVHSGEYFHGAFETCEKDLAILLFKSIGRTRPVDERAERFLNQFGGHHWIMD  
ARDFGLDGLDERVAEYFNLLFHPLSKQFITAMADVMMHPMGYRRYMWKFDY\*

>FraBLO\_ORIG\_scaffold\_315

MNRPEELIKKIYEEQGRINDVFLTACGGSLVDLYPGYYFLNAESETMHAHWLTAKELVVSPSKFLKKGAL  
VILCSHGNTGETVEAARLAKEHGAAIITMTHNPESICAREEMNPVVYSWEDDTNEKDRPQGIVMRVLNE  
LLKMQEESYSKYDAVL DGLEKADGIVRAAVKVKVNRWVFAEKYFEEPFLYIMGSGASYSQAYGFSICSL  
QEMQWMDCCYLHSGEYFHGPFECTDEDHLYILLMGTGAARTMDERL VFLKKYAKKYEVIDAVELGIDAI  
DASVNEYFCPMVYAMSVAYRTGLQDKRRHPLDMRRYMGVVEY\*

>FraBLO\_ORIG\_scaffold\_504

MIMKQEHMDQIGVAVKAVAACKDINHFFVACGGSQAFMMPAQYMFDRREIAIPASIYSSNEFVHRLPKAL  
GPDSVVITCSHSGNTPETVKATEIAREKGATTIALSNL VDSPLWKAAYPIHYDWGKEADASDLNKAVLY  
SLIFGILNTVAPCDKYEKGIASVENINEVIEKAKAQYADTVKGWGKKYKREKLIYTMGSGACYGETYSFA  
ICLLMEMQWIHSSCIHSGEYFHGPFVDFDFVPIIVKGLGATRPLDERAHNFCQKYSNIMLVDCETFD  
MTGIDEEVREYFAPLVAGAVLRSLADAFAYERGHDLGVRRYMWMKMEY\*

>FraBLO\_ORIG\_scaffold\_585

MTMTVKEIVGEIKEKLERAGGLKHVYFVACGGSKAAIFPGLYLLQSEARTFGATTYTSNEFVHAAPKELD  
SRCLAVICSLKATPETVEAVRTANAAGAVTIAMTGSMTGMAKVGQYVVTYSNGDEQVYSDSNQSNALRI  
GFELLHQIEGWDKYEKAMAAYAQIDAIVAEGKERCLAEARSWAEKYQDEPIFYVLASGPNYGVAYSMCCC  
HFMEMQWKHAVCLHTGEYFHGPFETDRALPMVLLMSEGRTRPLDERCLRFLEQYAENYITIDFQELNAG  
RIDPEVAEFFNPVLIPIERFYVAQMAELRGHSM DERRYMWKVPY\*

>FraBLO\_ORIG\_scaffold\_688

MEPKQIIEAIKKEVPAAKSVYFVCGGASKAELYPGKYFLEANARNIRVGHYTANEFYATPVAVDETAIV  
VTCSLGGTTPETVAASKKAMD LGAKVVAVTHVDGSPLAKNAHYVVLHGF EKNYAAKLEKMTKVL SLAVEI  
LHQYEGYDRYDDMTAFGKIYDLIEKAVSFVPAKNFAEDYKDAPVVYVMSSGATQEVAYAFSICLLME  
MQWVNSGSFHDGEFFHGPFEIVEKDVPFILLMNEGRTRALDSRALDFLNRFAQKTTVLDGKDFGLASEVP  
ASVAEYFNPMVLSAVLRVYAEQLAIKRNHPLTQRRYMWKLEY\*

>FraBLO\_ORIG\_scaffold\_1461

MKYEAKAWKETQGPLRNFDQKQIDS VNGALALRPQIESIIDRIWEDGFDGIYFAGIGGTYASGMQAEV  
YMRGRSSLPVFVENAAEFLTTGNKRFTKSVVIYSSVSGNTSEM VQLVERVREIGARIFAFIDTPGSVLT  
QPDKQDYLVVYPMNEQLKFYMVANYLMYKNGEFAEYERYNKEMEAHLAQAQAQVEKDADAWAYEYAKNKV  
AFLNGHRDLPHYFIGSGNQYGATYSYAMCYWEEQMWIRTKSISCOEFFHGMQEIIVADTPVTLFMGEDEQ  
RPLAERVAKFLPRVNANYTIIDTKEHELKGISPEFRGTISHLVMHG VNNRVDAYMELFLRHPLSIRRYR  
QFEY\*

>FraBLO\_ORIG\_scaffold\_1593

MTIQEIVATIKAKQPEIKTVYFVCGGASMSDLFPAKYFLENNAKKLRTSIYTANNFNYSTPAAVDNTSIV  
ITCSLSGNTPETVAATKLAVEKGAHVISITINAESGLAKNSQYQIIHGFYESYGAKMEKPARALELACEI  
LNEYEGYEHYDDLHDGLNKIFDLINTSAPLFRSTARKFAEENYNAPILYVMSSGATQYTAYGFSMFLMME  
MQWLESSTFHTGEFFHGPFE MADENAHYVLMNDGPTRPLDARALTFIQRMNAYTLIDAKDFGLSSH  
STVVEYFNPLMIGGLTRLLGEEIAIKREHPLTMRRYMWKLEY\*

>FraBLO\_ORIG\_scaffold\_2136

MIKGMQEVIVMEQAKAALEANGGLNQQVVFVACGGSLASSYPARYLLNQESSLRVQGYNSSEFVNATPKS  
VDKHTLVIASTKATPETVEAIKANAAGAVTIGLSGYADSLTAQSANYITYYHADEWYQDPTLVHCNS  
QGTALKIAFWLLKEYDNYASYDKALEAFEKMPQLYGQAYQSVKADAARFAMAYKDDAVWVMSSGAWEV  
AYSDAFCFFQEMQTVHCVPVHSGEYFHGAFETCDKDLAILLFKSVGRTRPLDDRAEHFLEKFGGHHWIID

AKELGLDQLDESVAEYFNAMMMHPISKQFISAMGDVRMHPMSYRRYMWKFEY\*  
>FraBLO\_ORIG\_scaffold\_2583  
MFYTSANMRDIIGEILAAKKEQGGVKSlyFVGCSSLGALYPAKTFMEREKAGIKSALISSNEFVHSTPR  
DFGKNSIICLACHKGNTPETIAAARLGREKGAIVLWLEQSEIVEHSDYTVLYSFDASPDHLAGDIDY  
AGEKTMCALLVAVELLQQTAGYENYEKFLAGREMLTAVIRKARAQVAKRALAFAQEYKDDSVIYTMGSGA  
GYGAAYMESICIFMEMQWLDSSSIHTGEYFHGPFEITDVRNPFMIQVSEGSTRPLDERCLKFLRTYGKRI  
EVLDKELGLSVIDPAVVDFNHSLFNNVYPIYNHALAEARKHPLPTRRYMWKVEY\*  
>FraBLO\_ORIG\_scaffold\_2686  
MNAKTVEIEILKEKGSIKQVYVWACGGSLIDLYPAHFMLNAESATIESGWYTSKEFILSTPKKLGKNSLV  
VMCSHSGNTQESVDAAVLAKEAGASVIALTDGKGSKSDPRFIAWVYPWGDGVPTSEVPSGITLLAAEL  
IKAQEGFDKYDALCDGIKKMDGIVAAAKTKVNAELGDFAKACQDNKFFYILGSGANFSQTYGFAICSLM  
EMQWQNCYSIHSGEYFHGPFEVTENGVFYFLQMGSGKCRPMDERALAFLKTHDRLMVLDTLEYGMDAVD  
LSVRDYLDVLLYAMNVELRAARGKVFHDSPDIRRYMGIEKY\*  
>FraBLO\_ORIG\_scaffold\_4979  
MSFEAKAWKETEGPFLKDFNEKEAIDSVNGALALRPQIEKVIDQIWDNGFDGIYFIGIGGTYASSMQVEV  
YMRGRSKLPVFNAAEFLTTGNKRFTDKSVVIYSSVSGNTKEMVQLVDRVHEIGAKVFAFIDTPGTTLT  
APDKQDYLYMYPKNEQLKfYmVANYLMYKNGEFPQYEAYNKEMEAHLAQLVDVEKEADAWAYEYAKNKV  
AFLADHPDLPHYFIGSGNQYGATYSYAMCYWEEQMWIRTKSISCSQEFFHGMQEIIIVADTPVTLFMGEDEQ  
RPLAERVAKFLPKVCANYTVIDTKELELKGISEENRGSISHLVMHGvNNRVDAYMELFLRHPLSIRRYR  
QFDY\*  
>FraBLO\_ORIG\_scaffold\_6866  
MNFNDEAKIRQEHQNGVDIIHQVEKHVDQVCKDGYSIGFYIGIGGTVLYANQMMHIAKQLGSKLPLYIEN  
AADFNLVGNPFFDEKSVVIESISGDTREVVEAVDKAHAAGARVIGYVEKEGTPLYEKSDYLVTTVGGGY  
YFWYTVTLRFLKNAGQFEKYDQFFKEIVHMPDNVVQIYKDADEDARAYAKEYCDEPITYLVGSGNLEDWA  
TCYGMCIEMEEMQWMRTRPISAAFFHGTLEVIERDIPVILIKGEDMTRPQMERVEKFVNTISAKVTVFDT  
KNFKLKGISDEFRGLAPIVMRSARQVNVHLEHCRRHPLAIRRYRRLDY\*  
>FraBLO\_ORIG\_scaffold\_12091  
MNKTVKEIIAEIKEKTDARGGLKHVYFVACGGSKAAIFPGLYLLQSEARTFSATTYTSNEFVHATPKELD  
GRCVAVICSLKATAETVEAVKTANQAGALTIAMTGSMETGMAQVGGYVVYTSNGDDQVYSDSNQANSLRI  
GFELLHQIEGWEHYDKAMEAYSHIDQIVAEGKESCLPAARAWAEKVKDEPVFVVLASGPNYGVAYSMMMCC  
HFMEMQWKHAVCLHTGEYFHGPFEETDKALPMVLLMSEGRTRALDERCLKFLNTYGENFIIIDFQELNKG  
RIHPSVVEFFNPVVMPIPIERYYSQMAELRGHSMDERRYMWKVEY\*  
>FraBLP\_ORIG\_scaffold\_34  
MIKGMQEVIDVMARVKSDDLKNGGLKQVVFVACGGSFASSYPARFLLNQESALRVQGYNSSEFVYATPKN  
IDKNTLVIGTSTKATAETVEALKKAKEKGAFTVGLSGYADSLTAQTADYYITYYHADEWYQDPTLIHNS  
QGTALKIAFWLLREYDRYAAYDMAMEGFEKLEAIYAGAYQSVKADAARFGMTYKDDQVWVMSSGAWEV  
SYSDAFCFFQEMQTVHCVPIHSGEYFHGFETCEKDLAILLFSIGRTRPVDERAERFLNQFGGHHWIMD  
ARDFGLDGLDERVAEYFNLSLLFHPLSKQFITAMADVRMHPMGYRRYMWKFDY\*  
>FraBLP\_ORIG\_scaffold\_242  
MNRPEELIKKIYEEQGRINDVFLTACGGSLVDLYPGYYFLNAESETMHAHWLTAKELVVSFSPKFLKKGAL  
VILCSHGNTGETVEAARLAKEHGAIIITMTHNPESICAREEMNPVVYSWEDDTNEKDRPQGIVMRVLNE  
LLKMQEESYSKYDAVLDGLEKADGIVRAAVKKVKNRTWVFAEKYFEFPFLYIMGSGASYSQAYGFSICSL  
QEMQWMDCCYLHSGEYFHGPFECTDEDHLYILLMGTGAARTMDERLALVFLKKYAKKYEVIDAVELGIDAI  
DASVNEYFCPMVYAMSVAAYRTGLQDKRRHPLDMRRYMGVVEY\*  
>FraBLP\_ORIG\_scaffold\_427  
MNKTVKEIIAEIKEKTDARGGLKHVYFVACGGSKAAIFPGLYLLQSEARTFSATTYTSNEFVHATPKELD  
GRCVAVICSLKATAETVEAVKTANQAGALTIAMTGSMETGMAQVGGYVVYTSNGDDQVYSDSNQANSLRI  
GFELLHQIEGWEHYDKAMEAYSHIDQIVAEGKESCLPAARAWAEKVKDEPVFVVLASGPNYGVAYSMMMCC  
HFMEMQWKHAVCLHTGEYFHGPFEETDKALPMVLLMSEGRTRALDERCLKFLNTYGENFIIIDFQELNKG  
RIHPSVVEFFNPVVMPIPIERYYSQMAELRGHSMDERRYMWKVEY\*

>FraBLP\_ORIG\_scaffold\_519

MIMKQEHMDQIGVAVKAVAAKDDINHFYFVACGGSQAFMMPAQYMFDRDREIAIPASIYSSNEFVHRLPKAL  
GPDSVVITCSHSGNTPETVKATEIAREKGATTIALSNLVDSPWKAAYPIHYDWGKEADASDLNKAVLY  
SLIFGILNTVAPCDKYEKGIASVENINEVIEKAKAQYADTVKGWGKKYKREKLIYTMGSGACYGETYSFA  
ICLLMEMQWIHSSCIHSGEYFHGPFVETDFDVPFIIVKGLGATRPLDERAHNFCQKYSNIMLVDCETFD  
MTGIDEEVREYFAPLVAGAVLRSLADAFAYERGHDLGVERRYMWKMEY\*

>FraBLP\_ORIG\_scaffold\_665

MTMTVKEIVGEIKEKLERAGGLKHVYFVACGGSKAAIFPGLYLLQSEARTFGATTYTSNEFVHAAPKELD  
SRCLAVICSLKATPETVEAVRTANAAGAVTIAMTGSMTGMAKVGGYVVTYSNGDEQVYSDSNQSNALRI  
GFELLHQIEGWDKYEKAMAAYAQIDAIVAEGKERCLAERSWAKEYQDEPIFYVLASGPNYGVAYSMMCCC  
HFMEMQWKHAVCLHTGEYFHGSFETTDRLPMVLLMSEGRTRPLDERCLRFLEQYAENYITIDFQELNAG  
RIDPEVAEFFNPVLIPIERFYVAQMAELRGHSMDERRYMWKVPY\*

>FraBLP\_ORIG\_scaffold\_731

MEPKQIIEAIKKEVPAAKSVYFVCGGASKAELYPGKYFLEANARNIRVGHYTANEFYATPVAVDETAIV  
VTCSLGGTTPETVAASKKAMD LGAKVVAVTHVDGSP LAKNAHYVVLHGFEKNYAAKLEKMTKVL SLAVEI  
LHQYEGYDRYDDMQTAFGKIYDLIEKAVSFVVPAAKNFAEDYKDAPVVYVMSSGATQEVAYAFSICLLME  
MQWVNSGSFHDGEFFHGPFEIVEKDVPFILLMNEGRTRALDSRALDFLNRFAQKTTVLDGKDFGLASEVP  
ASVAEYFNPMVLSAVLRVYAEQLAIKRNHPLTQRRYMWKLEY\*

>FraBLP\_ORIG\_scaffold\_1333

MFNFDQEKIRREHQNGIDIIPQVEKFVDQVCSNGYSNIFYIGIGGTVLYANQMMHIAKQLGSKLPLFIEN  
AADFNLVGNPFFDERSIVVIESISGDTKEVVEAVDKAHAMGAKVIGYVEKEGTPLYEKSDYLVTTVGGGY  
YFWYTVTLRFMKNAGQFDKYDQFFQEI VHMPPDNV VQIYKDADADAKAYAEQYCDEPLTYLVGAGNLEDWA  
VCYGMCIMEEMQWMRTRPISAAFFHGTLEVIERDIPVILIKGEDMARPQMERVEKFVNTISAKVIVFDT  
KNFKLEGISQEFRGMLSPIVMRSFQRINVHLEHCRRHPLPIRRYYRRLDY\*

>FraBLP\_ORIG\_scaffold\_1817

MTIQEIVATIKAKQPEIKTVYFVCGGASMSDLFPAKYFLENNAKLRTSIYTANNFNYSTPAAVDNTSIV  
ITCSLSGNTPETVAATKLAVEKGAHVISITINAESGLAKNSQYQIIHGFYYESYGAKMEKPARALELACEI  
LNEYEGYEHYDDLHDGLNKIFDLINTSAPLFRSTARKFAEENYNAPILYVMSSGATQYTAYGFSMFLMME  
MQWLESSTFHTGEFFHGPFEADENAHYVLMNDGPTPLDARALTFIQRMNAKYTLIDAKDFGLSSH  
STVVEYFNPLMIGGLTRLLGEEIAIKREHPLTMRRYMWKLEY\*

>FraBLP\_ORIG\_scaffold\_1968

MKQEHIDQINVAVKAVAEKKNINHFYFVACGGSQAFMMPAQYMFDRDREIATPASIYTSNEFVHRAPKALGP  
DSVVITCSHSGNTPETVKATEVARAKGATTIALSHLVDSPWKAAYPIHYDWGKEADASDLNKAVLYSL  
IFRILNAVAPCEKYEKGIASVENINDVIEKAKTQFADTVKAWGKKYKREELIYTMGSGACYGEAYSFAIC  
LLMEMQWIHNSCIHSGEYFHGPFVETDFDVPFIIVKGLGATRPLDERAYNFCQKYSDSIMLVDCETFD  
MTGIDEEVREYFAPLVAGAVLRSLADAFAYERGHDLGVERRYMWKMEY\*

>FraBLP\_ORIG\_scaffold\_1969

MKYEAKAWKETQGPSLRNFDEQKQIDSVNGALALRPQIESIIDRIWEDGFDGIYFAGIGGTYASGMQAEV  
YMRGRSSLPVFVENAAEFLTTGNKRFTKSVVIYSSVSGNTSEMVQLVERVREIGARIFAFIDTPGSVLT  
QPKQDYLVVYPMNEQLKFYMVANYLMYKNGEFAEYERYNKEMEAHLAQAQAQVEKDADAWAYEYAKNKV  
AFLNGHRDLPHYFIGSGNQYGATYSYAMCYWEEQMWIRTKSISCQEFFHGMQEIIIVADTPVTLFMGEDEQ  
RPLAERVAKFLPRVNANYTIIDTKEHELKGISPEFRGTISHLVMHGVMNRVDAYMELFLRHPLSIRRYR  
QFEY\*

>FraBLP\_ORIG\_scaffold\_2458

MIKGMQEVIVMEQAKAALEANGGLNQQVVFVACGGSLASSYPARYLLNQESSLRVQGYNSSEFVNATPKS  
VDKHTLVIAATSTKATPETVEAIKANAAGAVTIGLSGYADSLTAQSANYIITYYHADEWYQDPTLVHCNS  
QGTALKIAFWLLKEYDNYASYDKALEAFEKMPQLYQYQSVKADAAKFAMAYKDDAVNVMSSGAWEV  
AYSDAFCFFQEMQTVHCVPIHSGEYFHGAFETCDKDLAILLFKSVGRTRPLDDRAEHFLEKFGGHHWIID  
AKELGLDQLDESVAEYFNAMMMHPISKQFISAMGDVRMHPMSYRRYMWKFEY\*

>FraBLP\_ORIG\_scaffold\_3016

MFYTSANMRDIIGEILAAKKEQGGVKS LYFVGC GSSLGALYPAKTFMERE CAGIKSALISSNEFVHSTPR  
DFGKNSIICLACHKGNTPETIAAARLGREKGA AVIVLTWLEQSEIVEHSDYTVLYSFDASPDHLAGDIDY  
AGEKTMCALLVAVELLQQTAGYENYEKFLAGREMLTAVIRKARAQVAKRALAFAQEYKDDSVIYTMGSGA  
GYGAAYMESICIFMEMQWLDSSSIHTGEYFHGPFEITD VNRPFMIQVSEGSTRPLDERCLKFLRTYGKRI  
EVLDAKELGLSVIDPAVVDFNHSLFNNVYPIYNHALAEARKHPLPTRRYMWKVEY\*

>FraBLP\_ORIG\_scaffold\_3029

MNAKTVIEEILKEKGSIKQVYVWACGSSLIDLYPAHFMLNAESATIESGWYTSKEFILSTPKKLGKNSLV  
VMCSHSGNTQESVDAAVLAKEAGASVIALTDGKGSKSDPRFIAWVYPWGDGVPTSEVPSGITLLLAEL  
IKAQEGFDKYDALCDGIKKMDGIVAAAKTKVNAELGDAFAKACQDNKFFYILGSGANFSQTYGFAICSLM  
EMQWQNCYSIHSGEYFHGPFEVTENGVFYFLQMGSGKCRPMDERALAFLKTHDRLMVLDTLEYGMDAVD  
LSVRDYLDVLLYAMNVELRAARGKVFHDSPDIRRYMGIEKY\*

>FraBLP\_ORIG\_scaffold\_3339

MSYTGSDMKSIIGEILEKKKADGGVKS LYFVGC GSSLGALYPAKSFMERESADIKCALISSNEFVHSTPK  
DFGKNSVICLACHKGNTPETIAAARLGKEKGA AVIILT WLEQSEIVAYGDYVVCYAFDASPDHLAGDIDY  
GQEKTVCALLVAVELLEQTSGYENYDKFMAGREMLTSVIRNARAHVAKRALAFAEEYKDDSVIYTMGSGA  
GYGAAYMESICIFMEMQWLDSSSIHTGEYFHGPFEITDENRPFMIQVSEGSTRPLDERCLNFLRNYAKRI  
EVLDAKELGLSVIDPAVVDFNHSLFNNVYPIYNHALAEARKHPLPTRRYMWKVEY\*

>FraBLP\_ORIG\_scaffold\_3360

MEIRDLMEKI IKDMEAAGGIKNVWVAAGGSHDGHYAAQYFMDRESTAVRSQMITSSSEFVYAPPKNVGD  
TIVVLTSMRGTKETIEAAKVAKELGAVTVSQYVDESGLTEVCDYNVQYISIWEDDRDQSR TNAGNALRMA  
MAIVDIVEGYADYADAMDAFAKVQPAYIKAREYCAPLAVKWAAQAKDEKCITVLASGPAYGSGHIFSTCN  
ILEMLQIHSPTFNSCDFHFGPFEITDKNQSFLLIADGRTRKADERAITFVKKYAGDKVYILD AKELGLD  
NLKDSVSEYFNHLLFTPVLNNVYMKELSKATGIDYTTTRRYMWKVEY\*

>FraBLP\_ORIG\_scaffold\_6191

MLKFDEQKQINSVNGGLALRGEIERVVDEIQEKGFDGIYFIGIGGTWASSLQAEVYMRGRSALPVYVENA  
AEFITTGNKRFTKDSIVIFSSVTGNTEEMVKA VEKAKEIGAKVFGFVDKAEAEIVKLCDWCSISYPENEQL  
KFYMTANRLMYNNGEFPEYDRYNKEMEEHLAEALVNVEKKADAWAAEYAKEVYAYVKANPDMPHYFVGS  
NQWGATYSYAMCYWEEQLWIRTKSITCAEFFHGMLLEVVEAETPVTLFMGEDSQRPLAERVAGFLPKVCKN  
YVVIDSKDYELEGISTEFRGSLSHLVMHAVNNRVD AHLLEDEFRHPMVIRRYRQFEY\*

>FraBLP\_ORIG\_scaffold\_7856

MFNFDEAKIRQEHQNGVDIIHQVEKHVDQVCKDGYSGIFYIGIGGTVLYANQMMHIAKQLGSKLPLYIEN  
AADFNLVGNPFFDEKSVVIESISGDTREVVEAVDKAHAAGARVIGYVEKEGTPLYEKSDYLVTTVGGGY  
YFWYTVTLRFLKNAGQFEKYDQFFKEIVHMPDNV VQIYKDADEDARAYAKEYCDEPITYLVGSGNLEDWA  
TCYGMCIMEEMQWMRTRPISAAANFFHGTLEVI ERDIPVILIKGEDMTRPQMERVEKFVNTISAKVTVFDT  
KNFKLKGISDEFRGLAPIVMRS AFQRVNVHLEHCRRHPLAIRRYRRLDY\*

>FraB*Escherichia coli*\_str.\_K-12\_substr.\_w3110

VEKVLSHDVPLVHAIIVEEMVKRDIDRIYFVACGSPLNAAQTAKHLADRFSDLQVY AISGWFCDNTPYRL  
DDRCAVIGVSDYGKTEEVIKALELGRACGALTA AFTKRADSPITSAAEFSIDYQADCWEIHL LLYCYSVV  
LEMITRLAPNAEIGKIKNDLKQLPNALGHLV RTWEEKGRQLGELASQWPMIYTVAAAGPLRPLGYKEGIVT  
LMEFTWTHGCVIESGEFRHGPLEIVEPGVPFL FLLGNDESRTTERAINFVKQRTDNVIVIDYAEISQGL  
HPWLAPFLMFVPMEWLCYYLSIYKDHNPDERRYYGGLVEY

>FraB*Clostridiales bacterium*\_1\_7\_47FAA

AIALRPQIEKAVDEIC SQYTNIFFIGCGGT YAHS LPMKYWLDTTSQIDTYSVIAAEFMAAGHRKFTKDS  
VCVFSTRSGNTKEIVAAAKYCKEAGARTVVVYV SNDNTPVCEFADYKLF SFAEDDCLCEAIYTYMIALLAR  
FKKNAGEFDKYEEFMDQYAGIVPYLIKAKEQYEDRCAKMAQE HKD TDYH MVIGAGMMWGEAYDYAMCILE  
EMQWIKTKSIAAEYFHGTLELVEEDTSLILFYGEDETRPLMDRVMDFSKKVTKVINVFD TKEIELPFTE  
AEYRKIVSPMVMYAMTERLSCHLEKERNHPLTTRRYRQMEY

>FraB*Coprococcus comes*\_ATCC\_27758

MIGFIDVATAELAKLVYVITYPANEQLKFYMVADR FMYNAGEFPEYEDLYKELDQYLATALVEVEKEAD  
AFGEEFANRHKDDKIHYFVGAGNQYGATYSYAMCYWEEQH WIRTKSIHSAEFFHGMLEIIDKDTPVTVFI

GEDSQRSLSERVANFLPRICGKYNIIDTKKFELKGISPEYRGYISHLVMHAVTQRIDVHMEKVNCHPMEI  
RRYYRCLDY

>FraBSubdoligranulum\_sp.\_4\_3\_54A2FAA

VDGQVKAVQQAVAAARAVENVYFVACGGSLATLYPGKYILERETA AVSTGAYTAAEFLNDPPARLGKSLV  
VLNSQSGGTPETAAAARLATGRGALTAFTTTPGSALEQAADHIVYYFDDPASPYPAVLTI FPEVYKLT  
ALLDVWNGTGRLPEVNAAMLRLQDTFDEACAAYRPAARAFGAKYAGEPILYSIAAGLDACVGYVLTNCLV  
MESLWKHSSPLHAGEFFHGAFEAVDDTVAVFALLGLGKTRALEERAVKFLQRKTGKLTVLDAAALDLEVY  
PGWLRAPVSALVLNRLAALYCEMSYAMGHPISSRRYMGVEKY

>FraBClostridium\_hathewayi\_12489931

HIDQINTAVAAVAAKEVINHFYFVACGGSQAFMMPAQYTFDREISIPASIYSSNEFVHRAPKALGPDSVV  
ITCSHSGNTPETVKATEVAREKGA LTI ALSHLEDSP LWNAAEYPIHYDWGKEADASDLNKAVLYYLMFSI  
LNAVNPCEKYEKGIASVANLND AIEKAKAQYADTVKAWGSKYKREQMIYTMGSGACYGEAYSFAICLLME  
MQWIHSHAIHSGEYFHGPF E V T D F D V P F I I E G I G A T R P L D E R A Y N F C Q K Y S D K I M L V D A E T F D M T G I D E  
EVREYFAPLLAGAVLRSLADAFAYERGHDSLVRRYMWRMEY

>FraBCollinsella\_aerofaciens\_ATCC\_25986

VKD V V S Q V L A D K A D K G G I K R V V W I G A G G S N G G N Y P A Q Y F M E H E A T Q V V S S S Y T S N E F V H A T P A Y V N E N T L  
AVVSMRGTKETIVAAQVAKDHGASTIAIYVDESGLTEVCDYKIQYDSLAVDESCMGR TNSAVVTMIAME  
LTQQTEGYAEYETAMAAFDLVDPIYRKAVEYTRPLAAKWAEQNADKPCINVMAQGPLFGAAYVFSICNVQ  
EMLQIDSCTINTCDFHFGPF E I L D K R T S L F Q L I S V G R S R C N D E R G I R F V N Q Y G G E R V Y Q L D A K E L G L N D I  
KDSVSEYFNHLIFAPILNNVYMRALS AVTHKDYMTRRYMWKLDY

>FraBClostridium\_hylemonae\_DSM\_15053

IRKIIETIVKDREACGGIKNVVWLAAGGSNGGNYP AQYFMDREAKGIRSQMFTSNEFVYAPPKFVGENTI  
AVVTSMRGTPETCVA AKVAKELGAATIGLYVQESLLTETCDYNV KYDSIMFDES DQSKTNAALGMRIAMD  
IVDVTEGYEHYKDAMAAYDILDKVYNDAKAYCMLAEKWAEQNKEEHTISVMASGPAYAAGYIFSICNIM  
EMLQIQSPTINCCEFFHFGPF E V L D K N E S F F L L V S E G R T R K A D E R A V K F L R E Y G G D K I Y I L D A K E L G I N R F  
KDSVAEYFNHMLFSPILNNTYMKKLSAATKIDYLRRYMWKVQY

>FraBClostridiales\_butyrate-producing\_bacterium\_SS3/4

VKQIIAEIKEKMDQRGGLKHMVYFVACGGSKAAIFPGLYLIQSEAKNFSATTYTSNEFVHATPKELDERCI  
AVICSLKATPETVKAVETANAAGAITIAMTGMQTGMKAVGQYVVVTYSNGDHQDYSDSNQANALRIGFEV  
LHQFENWDKYDKAMDAYQYIDEIVSEGKKNCLPAAQAWAEKVEHEPVFYVLASGPNYGVAYSMCCCHFME  
MQWRHAVCLHTGEYFHGPF E T T D K K L P M I L L M S E G R T R A L D E R C L K F L N T Y A E N F I I I D F E K L N G G K I D P  
SVAEFFNPVVMPIPIERYVVSQLA EKTGHSM D E R R Y M W K V E Y

>FraBClostridium\_sp.\_M62/1

VKEIVKEIKEKMDRAGGLKHVYFVACGGSKAAIFPGLYLLQSEAKTFGATTYTSNEFVHAVPKGLDNRCV  
AVICSLKATPETVEAVKTANAAGAVTVAMTGMETGMKAVGQYVVVTYSNGDDQVYSDSNQANALRIGFEL  
LKQFENYENYDKAMAAYTEIDQIVAEGKEKALPIAQKWADTYKDEPIFYVLASGPNYGVAYSMCCCHFME  
MQWKHAVCLHTGEYFHGPF E T T D K Q L P I V L L M S E G R T R A L D E R C L K F L R Q Y A E N Y I T I D F K E L N Q G R I A P  
EVAEFFNPVVMPIPIERFYVAQMAEVRGHSM D E R R Y M W K V E Y

>FraBClostridium\_sp.\_7\_3\_54FAA

VKEIVAEIKAKMDQAGGLKHVYFVACGGSKAAIYPGLYLLQSEAKTFGATTYTSNEFVHATPKELDSRCV  
AVICSLKATPETVEAVKTANAAGAVTIAMTGMETGMKAGQYVVVTYSNGDDQVYSDSNQANSLRIGFEL  
LKQIENYENYDKAMEAYQYIDEIVEAGKKNVLYAATEWAQKYKDEPVFYVLASGPNYGVAYSMCCCHFME  
MQWKHAVCLHTGEYFHGPF E T T D K E L P M V L L M S E G R T R F L D E R C L K F L E K Y A K N Y I V I D F K E L N A G K I D P  
AVAEFFNPVVMPIPIERYVVSQMAEVRGHSM D E R R Y M W K V E Y

>FraBClostridium\_symbiosum\_WAL-14163

VKEIVAEIKTKMDQAGGLKHVYFVACGGSKAAIYPGLYLLQSEAKTFGATTYTSNEFVHATPKELDSRCV  
AVICSLKATPETVEAVKTANAAGAVTIAMTGMETGMKAGQYVVVTYSNGDDQVYSDSNQANSLRIGFEL  
LKQIENYENYDKAMEAYQYIDEIVEAGKKNVLYAATEWAQKYKDEPVFYVLASGPNYGVAYSMCCCHFME  
MQWKHAVCLHTGEYFHGPF E T T D K E L P M V L L M S E G R T R F L D E R C L K F L E K Y A K N Y I V I D F K E L N A G K I D P  
AVAEFFNPVVMPIPIERYVVSQMAEVRGHSM D E R R Y M W K V E Y

>FraBClostridium\_symbiosum\_WAL-14673  
VKEIVAEIKTKMDQAGGLKHVYFVACGGSKAAIYPGLYLLQSEAKTFGATTYTSNEFVHATPKELDSRCV  
AVICSLKATPETVEAVKTANAAGAVTIAMTGSMETGMAKAGQYVVVTYSNGDDQVYSDSNQANSLRIGFEL  
LKQIENYENYDKAMEAYQYIDEIVEAGKKNVLYAATEWAQKYKDEPVFYVLASGPNYGVAYS MCCCHFME  
MQWKHAVCLHTGEYFHGPFETTDKELPMVLLMSEGRTRFLDERCLKFLEKYAKNYIVIDFKELNAGKVDP  
AVAEEFNPVVMPIPIERYYSQMAEVRGHSMDERRYMWKVEY

>FraBClostridium\_acetobutylicum\_ATCC\_824  
IKSIISEILDKKKAKGGVKSIVVCGGSLGALYPAKT FMEKECTS IKS AWINSSEFIHSTPKDFGVNSI  
ICLACHKGNTPETIAAALGKEMGATVIILT WLK ESEIIEFGDYIIRYTFDASPDHLKGDIDYSGEKTIC  
ALLVAVELLAQT EGYENYNKFYEGTKMISNIIKNARNHVAERAVKFAEKYKDDSVIYTMGSGASYGAAYM  
ESICIFMEMQWLNSSSIHTGEYFHGPF EITDANRPFMIQISEGSTRDLDERALKFLNTYAKRIEVLDAKE  
LGLSTIDASVVDYFNHSLFNNVYPIYNHELATKREHPLPTRRYMWKVEY

>FraBClostridium\_bolteae\_90A9  
IKNIIAEILEAKKSKGGVKNLYFVCGGSLGALYPAKT FMEKECASIKSAWINSNEFVHSTPRDFGENSI  
ICLACHKGNTPETIEAAALGKEKGA AVIVL TWLEESEIIEFGDYIIRYAFDASPDHLKGDIDYAGEKTIC  
ALLVAVELTAQT EGYENYDKFQEGLMISNIIKNARAHVAERALEFAETYKNDPVIYTMGSGAAYGAAYM  
ESICIFMEMQWLDSSSIHTGEYFHGPF EITDANRPFMIQISEGSTRPLDERALKFLRTYAKRIEVLDAKE  
LGLSTIDASVVDYFNHSLFNNVYPIYNHALAEKREHPLVTRRYMWKVEY

>FraBClostridium\_bolteae\_90B3  
IKNIIAEILEAKKSKGGVKNLYFVCGGSLGALYPAKT FMEKECASIKSAWINSNEFVHSTPRDFGENSI  
ICLACHKGNTPETIEAAALGKEKGA AVIVL TWLEESEIIEFGDYIIRYAFDASPDHLKGDIDYAGEKTIC  
ALLVAVELTAQT EGYENYDKFQEGLMISNIIKNARAHVAERALEFAETYKNDPVIYTMGSGAAYGAAYM  
ESICIFMEMQWLDSSSIHTGEYFHGPF EITDANRPFMIQISEGSTRPLDERALKFLRTYAKRIEVLDAKE  
LGLSTIDASVVDYFNHSLFNNVYPIYNHALAEKREHPLVTRRYMWKVEY

>FraBClostridium\_clostridioforme\_90A7  
IKNIIAEILEAKKSKGGVKNLYFVCGGSLGALYPAKT FMEKECASIKSAWINSNEFVHSTPRDFGENSI  
ICLACHKGNTPETIEAAALGKEKGA AVIVL TWLEESEIIEFGDYIIRYAFDASPDHLKGDIDYAGEKTIC  
ALLVAVELTAQT EGYENYDKFQEGLMISNIIKNARAHVAERALEFAETYKNDPVIYTMGSGAAYGAAYM  
ESICIFMEMQWLDSSSIHTGEYFHGPF EITDANRPFMIQISEGSTRPLDERALKFLRTYAKRIEVLDAKE  
LGLSTIDASVVDYFNHSLFNNVYPIYNHALAEKREHPLVTRRYMWKVEY

>FraBClostridium\_bolteae\_90A5  
IKNIIAEILEAKKSKGGVKNLYFVCGGSLGALYPAKT FMEKECASIKSAWINSNEFVHSTPRDFGENSI  
ICLACHKGNTPETIEAAALGKEKGA AVIVL TWLEESEIIEFGDYIIRYAFDASPDHLKGDIDYAGEKTIC  
ALLVAVELTAQT EGYENYDKFQEGLMISNIIKNARAHVAERALEFAETYKNDPVIYTMGSGAAYGAAYM  
ESICIFMEMQWLDSSSIHTGEYFHGPF EITDANRPFMLQISEGSTRPLDERALKFLRTYAKRIEVLDAKE  
LGLSTIDASVVDYFNHSLFNNVYPIYNHALAEKREHPLVTRRYMWKVEY

>FraBClostridium\_bolteae\_90B7  
IKNIIAEILEAKKSKGGVKNLYFVCGGSLGALYPAKT FMEKECASIKSAWINSNEFVHSTPRDFGENSI  
ICLACHKGNTPETIEAAALGKEKGA AVIVL TWLEESEIIEFGDYIIRYAFDASPDHLKGDIDYAGEKTIC  
ALLVAVELTAQT EGYENYDKFQEGLMISNIIKNARAHVAERALEFAETYKNDPVIYTMGSGAAYGAAYM  
ESICIFMEMQWLDSSSIHTGEYFHGPF EITDANRPFMLQISEGSTRPLDERALKFLRTYAKRIEVLDAKE  
LGLSTIDASVVDYFNHSLFNNVYPIYNHALAEKREHPLVTRRYMWKVEY

>FraBClostridium\_bolteae\_90B8  
IKNIIAEILEAKKSKGGVKNLYFVCGGSLGALYPAKT FMEKECASIKSAWINSNEFVHSTPRDFGENSI  
ICLACHKGNTPETIEAAALGKEKGA AVIVL TWLEESEIIEFGDYIIRYAFDASPDHLKGDIDYAGEKTIC  
ALLVAVELTAQT EGYENYDKFQEGLMISNIIKNARAHVAERALEFAETYKNDPVIYTMGSGAAYGAAYM  
ESICIFMEMQWLDSSSIHTGEYFHGPF EITDANRPFMLQISEGSTRPLDERALKFLRTYAKRIEVLDAKE  
LGLSTIDASVVDYFNHSLFNNVYPIYNHALAEKREHPLVTRRYMWKVEY

>FraBClostridium\_bolteae\_ATCC\_BAA-613  
IKNIIAEILEAKKSKGGVKNLYFVCGGSLGALYPAKT FMEKECASIKSAWINSNEFVHSTPRDFGENSI

ICLACHKGNTPETIEAAKLGKEKGAIVLWLEESEIIEFGDYIIRYAFDASPDHLKGDIDYAGEKTIC  
ALLVAVELTAQTEGYENYDKFQEGLGMISNIIKNARAHVAERALEFAETYKNDPVIYTMGSGAAYGAAYM  
ESICIFMEMQWLDSSSIHTGEYFHGPF EITDANRPFMLQISEGSTRPLDERALKFLR TYAKRIEVLDAKE  
LGLSTIDASVVDYFNHSLFNNVYPIYNHALAEKREHPLVTRRYMVKVEY

>FraB*Escherichia\_hermannii*\_NBRC\_105704

IKEIVSGIVESKADKGGITHVYYYVACGGSYAAFYPAKAFLEKEATKVTVGLYNSGEFINNPPVALGKNAV  
VVVASHKGNTPETIKAAELAQSRGVPVIGL TWVTDSP LVAHCDYVETYSFGDGKDIAEEKTLKGLITAVE  
ILNQTEGYAHYEDFQDGLSKINRIVYRAWDLQNRAQAF AQEYKDDKVIYTMASGAGYGAAYLQSICIFM  
EMQWIHSACIHSGEFFHGPFEITDANTPFFFQFSEGSTRAVDERALNFLK KYGRRIEVVDAKELGLSTIK  
PTVIDYFNHSLFNNVYPVYNRALADIRQHPLTTRRYMVKVEY

>FraB*Salmonella\_enterica\_subsp.\_enterica\_serovar\_Enteritidis\_str.\_P125*  
109

MKETVSNIVTSQAEKGGIKHVYYYVACGGSYAAFYPAKAFLEKEAKALTVGLYNSGEFINNPPVALGENAV  
VVVASHKGNTPETIKAAE IARQH GAPVIGL TWVMDSP LVAHCDYVET YTFGDGKD IAGEKTMKGLLSAVE  
LLQQTEGYAHYDDFQDGVSKINRIVWRACEQVAERAQAF AQEYKDDKVIYTVASGAGYGAAYLQSICIFM  
EMQWIHSACIHSGEFFHGPFEITDANTPFLFQFSEGNTRAVDERALNFLK KYGRRIEVVDAKELGLSTIK  
TTVIDYFNHSLFNNVYPVYNRALAEARQHPLTTRRYMVKVEY

>FraB*Salmonella\_bongori*\_NCTC\_12419

MKETVSNIVTSRAEKGGVKYVYYYVACGGSYAAFYPAKAFLEKEAKALTVGLYNSGEFINNPPVALGENAV  
VVVASHKGNTPETIKAAE IARQH GAPVIGL TWIMDSPLVAHCDYVET YTFGDGKD IAGEKTMKGLLSAVE  
LLQQTEGYAHYDDFQDGVSKINRIVWRACEQVAERAQAF AQEYKDDKVIYTVASGAGYGAAYLQSICIFM  
EMQWIHSACIHSGEFFHGPFEITDANTPFFFQFSEGNTRAVDERAL TFLK KYGRRIEVVDAKELGLSTIK  
TTVIDYFNHSLFNNVYPVYNRALAEARQHPLTTRRYMVKVEY

>FraB*Salmonella\_enterica\_subsp.\_enterica\_serovar\_Paratyphi\_C\_str.\_RKS4*  
594

MKETVSNIVTSQAEKGGVKYVYYYVACGGSYAAFYPAKAFLEKEAKALTVGLYNSGEFINNPPVALGENAV  
VVVASHKGNTPETIKAAE IARQH GAPVIGL TWIMDSPLVAHCDYVET YTFGDGKD IAGEKTMKGLLSAVE  
LLQQTEGYAHYDDFQDGVSKINRIVWRACEQVAERAQAF AQEYKDDKVIYTVASGAGYGAAYLQSICIFM  
EMQWIHSACIHSGEFFHGPFEITDANTPFFFQFSEGNTRAVDERALNFLK KYGRRIEVVDAKELGLSTIK  
TTVIDYFNHSLFNNVYPVYNRALAEARQHPLTTRRYMVKVEY

>FraB*Salmonella\_enterica\_enterica\_sv.\_Typhimurium\_LT2-4*

MKETVSNIVTSQAEKGGVKHVYYYVACGGSYAAFYPAKAFLEKEAKALTVGLYNSGEFINNPPVALGENAV  
VVVASHKGNTPETIKAAE IARQH GAPVIGL TWIMDSPLVAHCDYVET YTFGDGKD IAGEKTMKGLLSAVE  
LLQQTEGYAHYDDFQDGVSKINRIVWRACEQVAERAQAF AQEYKDDKVIYTVASGAGYGAAYLQSICIFM  
EMQWIHSACIHSGEFFHGPFEITDANTPFFFQFSEGNTRAVDERALNFLK KYGRRIEVVDAKELGLSTIK  
TTVIDYFNHSLFNNVYPVYNRALAEARQHPLTTRRYMVKVEY

>FraB*Salmonella\_LT2*

MKETVSNIVTSQAEKGGVKHVYYYVACGGSYAAFYPAKAFLEKEAKALTVGLYNSGEFINNPPVALGENAV  
VVVASHKGNTPETIKAAE IARQH GAPVIGL TWIMDSPLVAHCDYVET YTFGDGKD IAGEKTMKGLLSAVE  
LLQQTEGYAHYDDFQDGVSKINRIVWRACEQVAERAQAF AQEYKDDKVIYTVASGAGYGAAYLQSICIFM  
EMQWIHSACIHSGEFFHGPFEITDANTPFFFQFSEGNTRAVDERALNFLK KYGRRIEVVDAKELGLSTIK  
TTVIDYFNHSLFNNVYPVYNRALAEARQHPLTTRRYMVKVEY

>FraB*Salmonella\_enterica\_subsp.\_enterica\_serovar\_Typhimurium\_str.\_1402*  
85

MKETVSNIVTSQAEKGGVKHVYYYVACGGSYAAFYPAKAFLEKEAKALTVGLYNSGEFINNPPVALGENAV  
VVVASHKGNTPETIKAAE IARQH GAPVIGL TWIMDSPLVAHCDYVET YTFGDGKD IAGEKTMKGLLSAVE  
LLQQTEGYAHYDDFQDGVSKINRIVWRACEQVAERAQAF AQEYKDDKVIYTVASGAGYGAAYLQSICIFM  
EMQWIHSACIHSGEFFHGPFEITDANTPFFFQFSEGNTRAVDERALNFLK KYGRRIEVVDAKELGLSTIK  
TTVIDYFNHSLFNNVYPVYNRALAEARQHPLTTRRYMVKVEY

>FraB*Citrobacter\_freundii\_GTC\_09629*

MKEIVSEILVSQEDKGGVKYVYVACGGSYAAFYPAKAFLEKEAKGLTVGLYNSGEFINNLPSALGENAV  
VIVASHKGNTPETIKAAELARQHGAPVIGLTWVMSPLVAHCDYVESYTFGDNKDIAEEKTMKGLLSAVE  
FLQQTEGYIHYDDFLDGVSKINRIVRACEHVAERAVSFAQEYKDDNVIYTVASGAGYGAAYLQSIICIFM  
EMQWIHSACIHSGEFFHGPFEITDANTPFFFQFSEGSARPVDERALNFKKYGRRIVVDAKELGLSTIN  
TTVIDYFNHSLFNNVYPVYNRALARARQHPLTTRRYMwKVEY

>FraBCitrobacter\_rodentium\_ICC168

MKEIVSTILASQADKGGVKHVYVACGGSYAAFYPAKAFLEKEAKGLTVGLYNSGEFIHNLPSALGENAV  
VIVASHKGNTPETIKAAELARQYGAPVIGLTWVMSPLVAHCDYVESYTFGDDKDIAEEKTMKGLLSAVE  
FLQQTEGYAHYADFQDGLSKINRIVRACEHVAERAAFAQNYKDDRVIYTMASGAGYGAAYLQSIICIFM  
EMQWIHSACIHSGEFFHGPFEITDANTPFFFQFSEGSTRPVDERALNFKKYGRRIEVVDAKELGLSTIK  
ATVIDYFNHSLFNNVYPVYNRALADARQHPLTTRRYMwKVEY

>FraBLactobacillus\_vaginalis\_ATCC\_49540

VQELVKKIVDTKDVKSLVFMGCGASYELFGAYYALQNSKELGSHLLEANEFNYDVPNYFGENTVAVIA  
SLGGTTKETLKAVHNAKEKGATVLALTAPDSPLTKETDYVLQHKFFESYATKSSKQKVALTFAVELLHA  
LGESNNYNEMVQGLSVVDEVANDAAASVDNDAQKFAERYKDEDKVFTLSSGSNRGVGYSTANFIFMEMQW  
ITGVNLDSEAEFHGPFELAVKEAPFLLFMSDGRTRHLDRALEFLQRFGTKYTVIDAKDYWLNSKMDASV  
VDYFDPLVLTSMRKAFAEYLGKARKHPLSKRRYMwKLENY

>FraBClostridium\_asparagiforme\_DSM\_15981

IKEIVTEVRAKYPEINNVYFVCGGASQSDLYTAKYFLVRNAKRLRTDLITANEFNFDPPSDLGDKSIVIT  
CSLGGTTPETVASKMAREKGSPIVCLTAPESPLAQNADYPIIHGFHESYSAKMQLTKCLQLAAEILE  
QYEGYEDYEDMMKGVEKIYGVIDAAPYAKPLAEKFARENKDERVIYVMGSGPSQQVAYTFSSFILMEMQ  
WVDSASFSAGEFFHGPFEIVDKDVPFLLLMNDGNTRPMDVRALEFLNRFDAKTTVVDAKDYGLGNEIPAS  
VKDYFNPIILLDGLRVYGEAIAEARKHPLTQRRYMwKLENY

>FraBClostridium\_clostridioforme\_2\_1\_49FAA

LKKIIEEIKAEERPEITSVIFVCGGASQAELYPAKYFLEGNACKLRTSLYTANEFVHATPACVGKESIIIT  
CSLGGNTPETVEASKKAMNMDAKVIAITHTPGSPLANSAHYVVLHGFEKNYAAKLEKMTFCLQLAAEILN  
QYEGYEHYQDMMTGFGKIFDLIEDAVSFVVPsAKKFAENYKDAPVIYVMSSGATHMVAYSFSICLLMEMQ  
WINSGSFHDGFEFFHGPFEIVDKDVPFLLLMNDGSTRALDSRALDFLNRFAQKTTLIDAKDFGLGsvIPAT  
VKDYFNPLITAVLRVYAEQLAILRNHPLTQRRYMwKLEY

>FraBClostridium\_clostridioforme\_90A1

LKKIIEEIKAEERPEITSVIFVCGGASQAELYPAKYFLEGNACKLRTSLYTANEFVHATPACVGKESIIIT  
CSLGGNTPETVEASKKAMNMDAKVIAITHTPGSPLANSAHYVVLHGFEKNYAAKLEKMTFCLQLAAEILN  
QYEGYEHYQDMMTGFGKIFDLIEDAVSFVVPsAKKFAENYKDAPVIYVMSSGATHMVAYSFSICLLMEMQ  
WINSGSFHDGFEFFHGPFEIVDKDVPFLLLMNDGSTRALDSRALDFLNRFAQKTTLIDAKDFGLGsvIPAT  
VKDYFNPLITAVLRVYAEQLAILRNHPLTQRRYMwKLEY

>FraBClostridium\_clostridioforme\_90A3

LKKIIEEIKAEERPEITSVIFVCGGASQAELYPAKYFLEGNACKLRTSLYTANEFVHATPACVGKESIIIT  
CSLGGNTPETVEASKKAMNMDAKVIAITHTPGSPLANSAHYVVLHGFEKNYAAKLEKMTFCLQLAAEILN  
QYEGYEHYQDMMTGFGKIFDLIEDAVSFVVPsAKKFAENYKDAPVIYVMSSGATHMVAYSFSICLLMEMQ  
WINSGSFHDGFEFFHGPFEIVDKDVPFLLLMNDGSTRALDSRALDFLNRFAQKTTLIDAKDFGLGsvIPAT  
VKDYFNPLITAVLRVYAEQLAILRNHPLTQRRYMwKLEY

>FraBClostridium\_clostridioforme\_90A4

LKKIIEEIKAEERPEITSVIFVCGGASQAELYPAKYFLEGNACKLRTSLYTANEFVHATPACVGKESIIIT  
CSLGGNTPETVEASKKAMNMDAKVIAITHTPGSPLANSAHYVVLHGFEKNYAAKLEKMTFCLQLAAEILN  
QYEGYEHYQDMMTGFGKIFDLIEDAVSFVVPsAKKFAENYKDAPVIYVMSSGATHMVAYSFSICLLMEMQ  
WINSGSFHDGFEFFHGPFEIVDKDVPFLLLMNDGSTRALDSRALDFLNRFAQKTTLIDAKDFGLGsvIPAT  
VKDYFNPLITAVLRVYAEQLAILRNHPLTQRRYMwKLEY

>FraBClostridium\_clostridioforme\_90A6

LKKIIEEIKAEERPEITSVIFVCGGASQAELYPAKYFLEGNACKLRTSLYTANEFVHATPACVGKESIIIT  
CSLGGNTPETVEASKKAMNMDAKVIAITHTPGSPLANSAHYVVLHGFEKNYAAKLEKMTFCLQLAAEILN



QYEGYEHYQDMMTGFGKIFDLIEDAVSFVVPsAKKFAENYKDAPVIYVMSSGATHMVAYSFSICLLMEMQ  
WINSGSFHDGEFFHGPFEIVDKDVPFLLLNMNDGSTRALDSRALDFLNRFAQKTTLIDAKDFGLGSVIPAT  
VKDYFNPMLITAVLRVYAEQLAILRNHPLTQRRYMWKLEY

>FraBClostridium\_clostridioforme\_90A8

LKKIIEEIKAEERPEITSVIFVGGASQAELYPaKYFLEGNAKKLRtSLYTANEFVHATPACVGKESIIIT  
CSLGGNTPETVEASKKAMNMDAKVIAITHTPGSPLANSaHYVVLHGFEKNYAaKLEKMTFCLQLAAEILN  
QYEGYEHYQDMMTGFGKIFDLIEDAVSFVVPsAKKFAENYKDAPVIYVMSSGATHMVAYSFSICLLMEMQ  
WINSGSFHDGEFFHGPFEIVDKDVPFLLLNMNDGSTRALDSRALDFLNRFAQKTTLIDAKDFGLGSVIPAT  
VKDYFNPMLITAVLRVYAEQLAILRNHPLTQRRYMWKLEY

>FraBClostridium\_clostridioforme\_90B1

LKKIIEEIKAEERPEITSVIFVGGASQAELYPaKYFLEGNAKKLRtSLYTANEFVHATPACVGKESIIIT  
CSLGGNTPETVEASKKAMNMDAKVIAITHTPGSPLANSaHYVVLHGFEKNYAaKLEKMTFCLQLAAEILN  
QYEGYEHYQDMMTGFGKIFDLIEDAVSFVVPsAKKFAENYKDAPVIYVMSSGATHMVAYSFSICLLMEMQ  
WINSGSFHDGEFFHGPFEIVDKDVPFLLLNMNDGSTRALDSRALDFLNRFAQKTTLIDAKDFGLGSVIPAT  
VKDYFNPMLITAVLRVYAEQLAILRNHPLTQRRYMWKLEY

>FraBLachnospiraceae\_bacterium\_oral\_taxon\_082\_str.\_F0431

AEELIRDVLKTKNIKDVFFVACGGSLVDLYPGFYFLNSESGTIHAHWMTAKEMSVAPSKFLNENALVLAC  
SHGGNTKEVINAVKVALKNGASVITMTHNPESICAREFNTVLYDWDDKTENERPQGIVLRILNELLKEK  
EPDYKKYDSILDGLENIDSIVRTATSKVKNRtWLFaEKYHNEKFLYIMGSGASYSQAYGFAICSLQEMQW  
MDCCYLHSGEYFHGPFECTDKDHLyILLMGTGNAREMDERCLDFLKkYGNKYEVIDAKDLGIDEIDESVN  
EYFCPMLFYNMTVAYRTALQNKRQHPLDMRRYMGVVEY

>FraB0ribacterium\_asaccharolyticum\_ACB7

MKELVTQILNGREKIEDVYFVACGGSLVDLYPGYYFVRtESRTMHADWITSKEFVVTPPAHLGKtSLVFI  
CSHGGNTKETVEAAHLAKDLGAaVAMTHTPGSACDSSLNPIVYsWEDDTNEKDKPQGIVLNILNELMK  
AQEPDYKLYDAVADGLEKADGIVRAAVKSVKNRtWLFaEKYAKEPFLYIMGSGAAyAAVYGFAICSLQEM  
QWIDCCYLNSAEYFHGPFEVtDEDHLyILLKSRGRNRVMDEraEVFLNKYAKKYEVIDANDLGLDAIDDS  
CVEYFNAMVFYAMSVAYRNALQDKRCHPTDMRRYMGVVEY

>FraB0ribacterium\_sp.\_oral\_taxon\_108\_str.\_F0425

MKELVTQILNGREKIEDVYFVACGGSLVDLYPGYYFVRtESRTMHADWITSKEFVVTPPAHLGKtSLVFI  
CSHGGNTKETVEAAHLAKDLGAaVAMTHTPGSACDSSLNPIVYsWEDDTNEKDKPQGIVLNILNELMK  
AQEPDYKLYDAVADGLEKADGIVRAAVKSVKNRtWLFaEKYAKEPFLYIMGSGAAyAAVYGFAICSLQEM  
QWIDCCYLNSAEYFHGPFEVtDEDHLyILLKSRGRNRVMDEraEVFLNKYAKKYEVIDANDLGLDAIDDS  
CVEYFNAMVFYAMSVAYRNALQDKRCHPTDMRRYMGVVEY

>FraBClostridium\_hathewayi\_WAL-18680

MKELVAKILEGREKIEDVYFVACGGSLVDLYPGYYFVRtESKTMHADWITSKEFVVTPPthLgKtSLVFI  
CSHGGNTKETVEAAHLSREKGAaVtMTHNPDSACNDNTMFPIVYDwADTVNEKDKPQGIVLNILNELMK  
VQEPDYPLYDAIVAGLEKADGIVRAAVKkVQNKtWLFaEKYAKEPFLYVMGSGASyASAYGFAICSLQEM  
QWIDCCYLNSAEYFHGPFEVtDEDHLyILLKGRGRNRVMDErVETFLQYgKkYEIIDANELGLEAIDDS  
CVEYFNPMVFYAMSVAYRNALQDKRCHPTDLRRYMGVVEY

>FraBEnterococcus\_faecium\_R497

VAKTVNAIVEKNDGEISGIYLVACGGSLVDMYVSDYFLKAEASKCITGLYTANEFNHVTPKQLDDKSVVI  
LCSHGGNTAETVKAGEVAQARGAVTVGLTHNKtADLLKvSDHSFLYEWGDDAKIVNNPMAIILDltVSLV  
NVTETFEHYGKFREGMKVIDTviENGIKQVQDRIKVFADKYKDETMFYILGSGPSYGHAYGFSICSLMEM  
QWLDSTSVHSGEFFHGPFEVtDKDtnFILLMSIGRTRALDERAKRFLDKYAERVEIVDAKELGLDMISDE  
VSEFFNPILFYSILSEYRSALADVRNHDLVRRYMGKVEY

>FraBKlebsiella\_pneumoniae\_subsp.\_pneumoniae\_WGLW1

TKEIINAVAKEIEDKGGIRQVFLVACGGSLVDMYPaKYFLDSEATKLHVGMYTANEFVYATPKTLGENSL  
VIVCSHGGNTPESVAAAKLAQQHQAHTITLTHNAQAQLIEYASHNILYAWGNDTNVVDNPMaIILNLCVD  
TLQQVEGFNNYADFQQGMtQINGVIAHGRQqVADRCQRFAQKYQDEKLFYILSSGASyGHAYGFAICSLM  
EMQWLHAAPiHSGEYFHGPFEVtNKETPFILLMNEGRTRAMDERALaFLTKYAekVEVDAKELGIGVLP

PSVVEFFNPVLFYSIMCEYRSALADIRQHPLDTRRYMGLVEY  
>FraBKlebsiella\_pneumoniae\_subsp.\_pneumoniae\_WGLW3  
TKEIINAVAKEIEDKGGIRQVFLVACGGSLVDMYPAKYFLDSEATKLHVGMYTANEFVYATPKTLGENSL  
VIVCSHGNTPEVSAAAKLAQQHQAHTITLTHNAQAQLIEYASHNILYAWGNDTNVVDNPMIILNLCVD  
TLQQVEGFNNYADFQQGMTQINGVIAHGRQQVADRCQRFAQKYQDEKLFYILSSGASYGHAYGFAICSLM  
EMQWLHAAPIHSGEYFHGPFEVTNKETPFILLMNEGRTRAMDERALAFLTKYA EKVEVDAKELGIGVLP  
PSVVEFFNPVLFYSIMCEYRSALADIRQHPLDTRRYMGLVEY

>FraBKlebsiella\_pneumoniae\_subsp.\_pneumoniae\_WGLW5  
TKEIINAVAKEIEDKGGIRQVFLVACGGSLVDMYPAKYFLDSEATKLHVGMYTANEFVYATPKTLGENSL  
VIVCSHGNTPEVSAAAKLAQQHQAHTITLTHNAQAQLIEYASHNILYAWGNDTNVVDNPMIILNLCVD  
TLQQVEGFNNYADFQQGMTQINGVIAHGRQQVADRCQRFAQKYQDEKLFYILSSGASYGHAYGFAICSLM  
EMQWLHAAPIHSGEYFHGPFEVTNKETPFILLMNEGRTRAMDERALAFLTKYA EKVEVDAKELGIGVLP  
PSVVEFFNPVLFYSIMCEYRSALADIRQHPLDTRRYMGLVEY

>FraBKlebsiella\_sp.\_MS\_92-3  
TKEIINAVAKEIEDKGGIRQVFLVACGGSLVDMYPAKYFLDSEATKLHVGMYTANEFVYATPKTLGENSL  
VIVCSHGNTPEVSAAAKLAQQHQAHTITLTHNAQAQLIEYASHNILYAWGNDTNVVDNPMIILNLCVD  
TLQQVEGFNNYADFQQGMTQINGVIAHGRQQVADRCQRFAQKYQDEKLFYILSSGASYGHAYGFAICSLM  
EMQWLHAAPIHSGEYFHGPFEVTNKETPFILLMNEGRTRAMDERALAFLTKYA EKVEVDAKELGIGVLP  
PSVVEFFNPVLFYSIMCEYRSALADIRQHPLDTRRYMGLVEY

>FraBKlebsiella\_oxytoca\_10-5250  
TKEIINAVAKEIEDKGGIRQVFLVACGGSLVDMYPAKYFLDSEATTLHVGMYTANEFVYATPKTLGENSL  
VIVCSHGNTPEVSAAAKLAQHHQAHTITLTHNAQAQLIEYANHNILYAWGNDTNVVDNPMIILNLCVD  
TLQQVEGFDNYADFQQGMAQINGVIAHGRQQVADRCQRFAQKYQDEKLFYILSSGASYGHAYGFAICSLM  
EMQWLHAAPIHSGEYFHGPFEVTDKETPFILLMNEGRTRAMDERALVFLTKYA EKVEVDAKELGIGVLP  
PSVVEFFNPVLFYSIMCEYRSALADIRQHPLDTRRYMGQVEY

>FraBKlebsiella\_oxytoca\_10-5243  
TKEIINAVAKEIEDKGGIRQVFLVACGGSLVDMYPAKYFLDSEATTLHVGMYTANEFVYATPKTLGVNSL  
VIVCSHGNTPEVSAAAKLAQQHQAHTITLTHNAQAQLIEYASHNILYAWGNDTNVVDNPMIILNLCVD  
TLQQVEGFDNYADFQQGMAQINGVIAHGRQQVADRCQRFAQKYQDEKLFYILSSGASYGHAYGFAICSLM  
EMQWLHAAPIHSGEYFHGPFEVTDKETPFILLMNEGRTRAMDERALVFLTKYA EKVEVDAKELGIGVLP  
PSVVEFFNPVLFYSIMCEYRSALADIRQHPLDTRRYMGLVEY

>FraDEscherichia\_coli\_str.\_K-12\_substr.\_W3110  
MKTLATIGDNCVDIYPQLNKAFSGGNAVNAVYCTRYGIQPGCITWVGDDDDYGTKLKQDLARMGVDISHV  
HTKHGVT AQTQVELHDNDRVFGDYTEGVMADFA LSEEDYAWLAQYDIVHAAIWGHAEDAFPQLHAAGKLT  
AFDFSDKWD SPLWQTLVPHLDFAFASAPQEDELRLKMKAI VARGAGTVIVTLGENGSI AWDGAQFWRQA  
PEPVTVIDT MGAGDSFIAGFLCGWSAGMTLPQAIAQGTACA AKTIQYHGAW

>FraDCoprococcus\_comes\_ATCC\_27758  
KIRVAAIGDNCIDYDSLNESYPPGPNVNAVYIKRLGGESSYTGAVGTDSFGKIMISAIQNKGVDTSHV  
QVLDGKTAVTHVDIVDGRVFGKYEEGVLADFKLREQDISFIKKHDLAVTGIWGMIEDELPLISKEIPVA  
FDFANKFANPIVEKAIPYVTYAFFSFDEESRNEFRQKYHSMGLKEKENCTEQLKEFMKAMQQKGPVIA  
TLGKNGSIGYDGN SWYRFGIIECKVVDTMGAGDSFIAGFLY GILNGLNVQDSMEAGA QNSAVTIGYQGAW

>FraDClostridium\_hylemonae\_DSM\_15053  
KPRILGIGIATMDIYCHQRRMYPGGNEYNIAYNAGLLGADAGFMGVFADDMAGSILEQTL LDAGIDTSHS  
HHEKGS SGYALVDLKDGRVFLDWNKKGVTDLYPFTFTEEEITYIKTYDIACISWG ARVDKSRMKKLAGA  
GVPICYDFYDNFTAEDIDSISP YIKFAFFSCSHMSEETKNILAACVRLGVRIAVGTRGGEP AIACDGSR  
FYTQEVFRVKAKDTMGAGDSYISAF LTNYSAEADESFTAEDKITASL KKAEEFAAAVVKDGS LG

>FraDLactobacillus\_vaginalis\_ATCC\_49540  
MKVLAIGDNVMDIYLD SKRIFPGGNAVNF SVMATRIPKITSGYLGNFGNDNLAELMKSTLKT FNVNIDHC  
RNLKGESGYSLVKVVNGDRKFLASNRGGVLNQG IKSDDKDYINAMDLIHLSVNGKGKEIINYINKPKIV

YDYSDFSNEDEITLTINNVDLACFSVGNISKDKVVERARQLQSMGNYHTILLFTMGKQGAMVFTGNRCYY  
QSAQLTNHIKDTMGAGDSFITYFSTGLLENWDISSIPNILKSASLFSKQLQIDGSLG

>FraDSubdoligranulum\_sp.\_4\_3\_54A2FAA

MKLLGIGDNVLDYRWRQELYPGGNSVNPVVLARRYDGSAAAYIGVLADDGAGLHFASALREEGVDIRV  
RVMHGVSARNYIELDEAGDRHFVGNNGRETAQYQALLCLTPGDYAMMEQYDLAHTSIHSLDAYHPAISR  
RVPLSLDFSGEYDRVNIAQLCPLLRFAFFSFGAASEEEVRALARTALDAGARTVVVTMGVRSYLLEQGR  
EHRQECMRADVVDALGAGDAFIAAFLAEYHAGGGDLADAAQKASVFAAQCCGHYGAFG

>FraDClostridiales\_butyrate-producing\_bacterium\_SS3/4

MIKIVIGIGDNVCDQYYPAKIMYPGGQAMNFSVYAKMLGAQSAYLGVFGKDRVAEHIISVLDEIGIDHSRC  
RQYAGENGYAKVRENGDRQFIMSNRGGIVNEHPLDLKPEDISYIREFSLVHTSNNGHFDSQLKKVRETG  
IPVSYDFSGHWNEEYLLKEIAPVVDYAFFSCGEIDEETAKAACKRFVSEGCKIAVATMGKRGSLAFDGKK  
YYRQIPKAVAAIDTLGAGDSFTTAFLLSFLDGEKIETAMEKGAEEFAAKTCMVRGAFG

>FraDClostridium\_sp.\_M62/1

MRVIGIGDNVCDKYIYLNTMFPGGQALNFAVYTKMLGADSSYMGTFGRDEVAEHILATLDELGVKHERCR  
QYDGENGYARVTLVDGDRVFLGSNKGKIAKEHPVVLDSDDMEYVKQFSHIHTSNNSYFDSQLPKLAEAGL  
SVSYDFSGQWTDPEKVARVAPYIRYAFSLSCGSIPEVEAEKICRAIHEAGCPMVITTRGSYGSMLYDGNRF  
YEQKPQLVEAVDTLGAAGDSFAAFLSYIGSLEDKKAQGRADQGAFIKKAMAAGAEFAAKTCMVQGAFG

>FraDClostridium\_sp.\_7\_3\_54FAA

MVRVIGIGDNVCDKYEHLKTMFPGGQALNFSVYAKLLGADASYMGVFGTDEVAVHVIKTLDELGVEHGRC  
RQYEGENGARVTLKDGDRIFLGSNKGKVSKEHPFELTEEDLAYISTFSLVHTSNNSYMDSQLEKIHRAG  
IPISYDFSGQWIDDGRVCRVAPYASYVFLSCGSVTEEEGREICHRMHARGCRFIVATRGSKGALVYDGH  
FYSQPPHLVEAIDTLGAGDSFATAFLLSLTQSRKEYRDRMDSRKLRYRQLKEAMEKGASFAAATCLVQ  
AFG

>FraDClostridium\_symbiosum\_WAL-14673

MVRVIGIGDNVCDKYEHLKTMFPGGQALNFSVYAKLLGADASYMGVFGTDEVAVHVIKTLDELGVEHGRC  
RQYEGENGARVTLKDGDRIFLGSNKGKVSKEHPFELTEEDLAYISTFSLVHTSNNSYMDSQLEKIHRAG  
IPISYDFSGQWIDDGRVCRVAPYASYVFLSCGSVTEEEGREICHRMHARGCRFIVATRGSKGALVYDGH  
FYSQPPHLVEAIDTLGAGDSFATAFLLSLTQSRKEYRERMDSRKLRYRQLKEAMEKGASFAAATCLVQ  
AFG

>FraDClostridium\_symbiosum\_WAL-14163

MVRVIGIGDNVCDKYEHLKTMFPGGQALNFSVYAKLLGADASYMGVFGTDEVAVHVIKTLDELGVEHGRC  
RQYEGENGARVTLKDGDRIFLGSNKGKVSKEHPFELTEEDLAYISTFSLVHTSNNSYMDSQLEKIHRAG  
IPISYDFSGQWIDDGRVCRVAPYASYVFLSCGSVTEEEGREICHRMHARGCRFIVATRGSKGALVYDGH  
FYSQPPHLVEAIDTLGAGDSFATAFLLSLTQSRKEYRERMDSRKLRYRQLKEAMEKGASFAAATCLVQ  
AFG

>FraDClostridiales\_bacterium\_1\_7\_47FAA

MKIAGIGDNVIDRYMNMGMVFPGGNAVNVAAHASRLGAVAAYVGSIGADREGRIIRDALTALNVDLSQCI  
FHEDSTTKCDVNVYDGERDYIGADEGKNWAHTTRIRDCDVDYLRDFDVVHTSCNAKLHEDVHKLQDLQA  
MVTDFDFSVKDKYRTHFLELTCPYLELQGFSCHEMETEAIRELMRKVYGGCRNVVATMGGRQLFYNGK  
EFVEGKARYVKALDTMGAGDSFIAAVIVSLLKQGWKKGITLTGDAIRQALQDGASYSANCLCEGGFG

>FraDClostridium\_acetobutylicum\_ATCC\_824

NYKIVAIGDNVCDKYL SRGKMYPGGQCINTCVYGMNGAETAYIGKYGNDEVAECVQNTLKEIGIDDSHC  
RHYEGENGALVTLKNADRVFLGSNKGKIAKEHSYNFDENDFEYIKKFDLIYTNLNSYIEDNLKELHATG  
VPIAYDFSMRWTDYELLKVCOPYIDVAILSCAHLTAEEREKEMKKVQNYGVKIVLGTIGEDGSYVLYNGDF  
LYTSAIMAAANIIDTMGAGDSYFSTFLCSLLQTSSETGKLVGTEKESMKIRLESAMKSGAIFAANVCGMEGA  
FG

>FraDClostridium\_bolteae\_90A9

DYKIIAVGDNVCDKYL SRGRMYPGGQCVNTCVYAKLNGAYTAYLGKYGSDQVAECVRDTLQIGIDDSHS  
RCHEGENGFALVTLKGNDRVFLGSNKGKVVAREYGYDFTEEDFAYISQFNLIYTNLNSYIEDDLKSLKETG  
VAIAYDFSTRWTDAYLEKVCOPYVTVAILSCAHLTRQERETEMKKVQSYGVKVVLTIGEDGSYVLYDDSF

LYAPAVHADDVIDTMGAGDSYFAAFLCSLLETSQTGAVVEGTEDRMKERLVEAMKKGAAFAAKMCAKEGA  
FG

>FraDClostridium\_bolteae\_90B3

DYKIIAVGDNVCDKYL SRGRMYPGGQCVNTCVYAKLNGAYTAYLGKYGSDQVAECVRDTLKQIGIDDSHS  
RCHEGENGFALVTLKGNDRVFLGSNKGGVAREYGYDFTEEDFAYISQFNLIYTNLNSYIEDDLKSLKETG  
VAIAYDFSTRWTDAYLEKVCYVTVAILSCAHLTRQERETEMKKVQSYGVKVVLTIGEDGSYVLYDDSF  
LYAPAVHADDVIDTMGAGDSYFAAFLCSLLETSQTGAVVEGTEDRMKERLVEAMKKGAAFAAKMCAKEGA  
FG

>FraDClostridium\_clostridioforme\_90A7

DYKIIAVGDNVCDKYL SRGRMYPGGQCVNTCVYAKLNGAYTAYLGKYGSDQVAECVRDTLKQIGIDDSHS  
RCHEGENGFALVTLKGNDRVFLGSNKGGVAREYGYDFTEEDFAYISQFNLIYTNLNSYIEDDLKSLKETG  
VAIAYDFSTRWTDAYLEKVCYVTVAILSCAHLTRQERETEMKKVQSYGVKVVLTIGEEGSYVLYDDSF  
LYAPAVHADDVIDTMGAGDSYFAAFLCSLLETSQTGAVVEGTEDRMKERLVEAMKKGAAFAAKMCAKEGA  
FG

>FraDLachnospiraceae\_bacterium\_oral\_taxon\_082\_str.\_F0431

NVKVLGFGDNVVDIYEKSNMYPGGNCVNL SVYSKLFVVKRSAYMGYFGNDNIAEYI IKVLENIGIEMFK  
CEQLIGENGWSKCTLNNGDRIFGDYNQGGVGRKTPYILDRFDIEYMKEFDVHSGNYCYTESQLQMKMEA  
GIKVSFDFSDSTIEYYKYPFVYAFCSFDGDEKAKEHLKFVYSLGPEIVSVTRGVKGCIMYDGERF  
YTQPAKIVDNVVDTLGAGDAFLTIFMDSYIDGLHNGVDKQNAIMKALDEAAEFSAKVCQMNGAFG

>FraDCollinsella\_aerofaciens\_ATCC\_25986

NVNALGFGDNVVDRIEHIHTMYPGGNAVNFVYAKKCGAARSAYMGIFGNDAAAEHV IASLEDEGIELDK  
CEQMIGENGAARVTVDGDRVFLGSNEGGIRGDARYVLDLRFDLAYMKQFDVVHSGNYCFTERELPKLAA  
GVTVSFDFSDSTDEYYEQIAPYVDFAFFSAADAASEDEIRERLAWVKGLGPRFVSATAGAEGCIAYDGE  
RYYRQLAKPVTDMDKDTMGAGDSFLTSFLMCYLDSAKRGEDGAEAIERALDFAAGFASTVCGMEGSWG

>FraDOribacterium\_asaccharolyticum\_ACB7

DVSVLGFSGDNVVDKYEHIKTMYPGGNCVNFVYAKMFGAKRSAYMGYFGNDAAAEHV MYALDDIEIETVK  
CKQLEGENGCARATLVDGDRVFLGSNEGGIRGKTPYVLDLRFDLLEYIRQDFVHSGNYCFMEKELPKIHEA  
GVPISFDFSDSSESYAAEVAPTVDYAFCSFDGTDEEAREHLKIVSYGPKLAVASRGADGCILYDQGEY  
YVQKAVPIKEVVDTMGAGDSLITSFMVAYTDYLKKGIMGETAIRESLAAAFAASKVCGMNGAFG

>FraDOribacterium\_sp.\_oral\_taxon\_108\_str.\_F0425

DVSVLGFSGDNVVDKYEHIKTMYPGGNCVNFVYAKMFGAKRSAYMGYFGNDAAAEHV MYALDDIEIETVK  
CKQLEGENGCARATLVDGDRVFLGSNEGGIRGKTPYVLDLRFDLLEYIRQDFVHSGNYCFMEKELPKIHEA  
GVPISFDFSDSSESYAAEVAPTVDYAFCSFDGTDEEAREHLKIVSYGPKLAVASRGADGCILYDQGEY  
YVQKAVPIKEVVDTMGAGDSLITSFMVAYTDYLKKGIMGETAIRESLAAAFAASKVCGMNGAFG

>FraDClostridium\_hathewayi\_WAL-18680

QVSVLGFSGDNVVDKYEHIKTMYPGGNCVNFVYQAQMFGAERSAYMGYFGNDAAAEHV IHTLEEIGIETVK  
CKQLEGENGCARATLVDGDRVFLGSNEGGIRGETPFVLDLRFDMEYIRQDFVHSGNYCFTEAELPKIKAA  
GVPVSFDFSDSTEEYYQEVAPSVDYAFCSFDGTDEEAREHLKQVVSYGPKLAVASRGADGCILYDGKDF  
YVQKAAP IENVVDTMGAGDSLITSFMVGYTDHLKKGVTGAVAIRESLEEAAKFAAKICGISGAFG

>FraDClostridium\_asparagiforme\_DSM\_15981

AMKVVGLGDNVVDKYEHIRVMYPGGNAMNFVAFARQLGVQAAFLGAFGDDPEGEHVAESARQEGVDISRC  
RRYHGENGCARVLENGDRVFQGSNRCGVLRTGLRLEPEDYEYLLGFDLIHSGIFGFAEDEVRTLKERG  
ARISFDFSSSFTGEYLKRVLPYVDYPVFCSHLEMGERLLEYYAAGQGCALTLCTRGESGAWLADGKEV  
YRQRPYLVEARDTMAAGDSFLTCLVNYLNESQKNPGGHEAAVTVSLERAAQFAANQCMVDGSWG

>FraDClostridium\_hathewayi\_12489931

MRLGLGDNVIDYTTNTGAVYPGGNAFNAAVHASILGAEAAAYMGNLADDAMSEVIVDALNRFHVDVFSKCR  
KIPGTITKCCRYRVTGDERTYLGITAGDRWSGPLLLQEEDMEYLRFSLIHSSCNAKMEGEMSRLSGLPA  
LFTYDFGEKEKYRTDSYYDKICCGLDLALFSCPPMEESEIRSFCEPLHKRNTGLVLTITMGSSGQCVSDGT  
SLVYGKAEYIDPVDTMGAGDSFLTAFVMALCEQGWTKGRIPAPAMIGLALEKATAYSTANCMKKGSGF

>FraDKlebsiella\_pneumoniae\_subsp.\_pneumoniae\_WGLW1

MMNVIGIGDNNVVDKYVHTQTMYPGGNALNFAAYAAMLGHNAAYLGIFGNDAAAHEVMQVLDKVGKWPFC  
LQVAGENGCAQLKIEEGERIFLGSNAGGIRKTTSMDFIFQHEQYLREFDLIHSGCYSYMETHLPQLRELN  
IPVSFDFSDDFVLEQALPLCRYVDFAFFSCADYSLAQTREIVQQAQASGSRIVCATRGDEGAILFDGQDW  
YQQAPDYVTPVDTMGAGDAFITAFICHFLAQPTGNKREAITNSLQKAAAFSAQICLKEGAFG

>FraDKlebsiella\_pneumoniae\_subsp.\_pneumoniae\_WGLW3

MMNVIGIGDNNVVDKYVHTQTMYPGGNALNFAAYAAMLGHNAAYLGIFGNDAAAHEVMQVLDKVGKWPFC  
LQVAGENGCAQLKIEEGERIFLGSNAGGIRKTTSMDFIFQHEQYLREFDLIHSGCYSYMETHLPQLRELN  
IPVSFDFSDDFVLEQALPLCRYVDFAFFSCADYSLAQTREIVQQAQASGSRIVCATRGDEGAILFDGQDW  
YQQAPDYVTPVDTMGAGDAFITAFICHFLAQPTGNKREAITNSLQKAAAFSAQICLKEGAFG

>FraDKlebsiella\_sp.\_MS\_92-3

MMNVIGIGDNNVVDKYVHTQTMYPGGNALNFAAYAAMLGHNAAYLGIFGNDAAAHEVMQVLDKVGKWPFC  
LQVAGENGCAQLKIEEGERIFLGSNAGGIRKTTSMDFIFQHEQYLREFDLIHSGCYSYMETHLPQLRELN  
IPVSFDFSDDFVLEQALPLCRYVDFAFFSCADYSLAQTREIVQQAQASGSRIVCATRGDEGAILFDGQDW  
YQQAPDYVTPVDTMGAGDAFITAFICHFLAQPTGNKREAITNSLQKAAAFSAQICLKEGAFG

>FraDKlebsiella\_pneumoniae\_subsp.\_pneumoniae\_WGLW5

MMNVIGIGDNNVVDKYVHTQTMYPGGNALNFAAYAAMLGHNAAYLGIFGNDAAAHEVMQVLDKVGKWPFC  
LQVAGENGCAQLKIEEGERIFLGSNAGGIRKTTSMDFIFQHEQYLREFDLIHSGCYSYMETHLPQLRELN  
IPVSFDFSDDFVLEQALPLCRYVDFAFFSCADYSLAQTREIVQQAQASGSHIVCATRGDEGAILFDGQDW  
YQQAPDYVTPVDTMGAGDAFITAFICHFLAQPTGNKREAITNSLQKAAAFSAQICLKEGAFG

>FraDKlebsiella\_oxytoca\_10-5243

MMNVIGIGDNNVVDKYAHTQTMYPGGNALNFAAYAAMLGHNAAYLGIFGNDAAAHEVMQVLDKVGKWPFC  
LQVAGENGCAQLKIEEGERIFLGSNAGGIRKTTSMDFIFQHEQYLREFDLIHSGCYSYMETQLPQLRKLN  
IPVSFDFSDDFVLEQALPLCRYVDFAFFSCADYSLAQTREIVQQAQASGSRIVCATRGDEGAILFDGQDW  
YQQAPDYVTPIDTMGAGDAFITAFVCHFLAQPTGNKREAITNSLQKAAAFSAQICLKEGAFG

>FraDKlebsiella\_oxytoca\_10-5250

MMNVIGIGDNNVVDKYAHTQTMYPGGNALNFAAYAAMLGHNAAYLGIFGNDAAAHEVMQVLDKVGKWPFC  
LQVAGENGCAQLKIEEGERIFLGSNAGGIRKTTSMDFIFQHEQYLREFDLIHSGCYSYMETQLPQLRKLN  
IPVSFDFSDDFVLELALPLCRYVDFAFFSCADYSLAQTREIVQQAQASGSRIVCATRGDEGAILFDGQDW  
YQQAPDYVTPVDTMGAGDAFITAFVCHFLAQPTGNKREAITNSLQKAAAFSAQICLKEGAFG

>FraDClostridium\_clostridioforme\_2\_1\_49FAA

MLRVLGLGDNVVDKYMHIRTMYPGGNALNFAVYAKMFGMEAGYLGVF GDDEAAAHVYDTIRGLGLELSHC  
RFYPGENGYAEVRLDNGDRVFIGSNRGGVSREHPLELTAMDRAIYAGYDIVHTSIFS YIEDELPLIRQAS  
SFVSMDFSDRADEEYLRQCAPYVDCASISCGNMPRSEIEKQMTLIRKFGCRHIV IATRGAKGALVMVDGR  
LYEQSPCLVEAVDTMGAGDSFITCFLINYVDAMKDSRDFPSASGTKGTVTAADYQDLAVRTSLYRAAVYS  
AGNCQKEGSFG

>FraDClostridium\_clostridioforme\_90A1

MLRVLGLGDNVVDKYMHIRTMYPGGNALNFAVYAKMFGMEAGYLGVF GDDEAAAHVYDTIRGLGLELSHC  
RFYPGENGYAEVRLDNGDRVFIGSNRGGVSREHPLELTAMDRAIYAGYDIVHTSIFS YIEDELPLIRQAS  
SFVSMDFSDRADEEYLRQCAPYVDCASISCGNMPRSEIEKQMTLIRKFGCRHIV IATRGAKGALVMVDGR  
LYEQSPCLVEAVDTMGAGDSFITCFLINYVDAMKDSRDFPSASGTKGTVTAADYQDLAVRTSLYRAAVYS  
AGNCQKEGSFG

>FraDClostridium\_clostridioforme\_90A3

MLRVLGLGDNVVDKYMHIRTMYPGGNALNFAVYAKMFGMEAGYLGVF GDDEAAAHVYDTIRGLGLELSHC  
RFYPGENGYAEVRLDNGDRVFIGSNRGGVSREHPLELTAMDRAIYAGYDIVHTSIFS YIEDELPLIRQAS  
SFVSMDFSDRADEEYLRQCAPYVDCASISCGNMPRSEIEKQMTLIRKFGCRHIV IATRGAKGALVMVDGR  
LYEQSPCLVEAVDTMGAGDSFITCFLINYVDAMKDSRDFPSASGTKGTVTAADYQDLAVRTSLYRAAVYS  
AGNCQKEGSFG

>FraDClostridium\_clostridioforme\_90A4

MLRVLGLGDNVVDKYMHIRTMYPGGNALNFAVYAKMFGMEAGYLGVF GDDEAAAHVYDTIRGLGLELSHC  
RFYPGENGYAEVRLDNGDRVFIGSNRGGVSREHPLELTAMDRAIYAGYDIVHTSIFS YIEDELPLIRQAS

SFVSMDFSDRADEEYLRQCAPYVDCASISCGNMPRSEIEKQMTLIRKFGCRHIVIAIRGAKGALVMVDGR  
LYEQSPCLVEAVDTMGAGDSFITCFLINYVDAMKDSRDFPSASGKGTVTAADYQDLAVRTSLYRAAVYS  
AGNCQKEGSFG

>FraDClostridium\_clostridioforme\_90A6

MLRVLGLGDNVVDKYMHIRTMYPGGNALNFAVYAKMFGMEAGYLGVF GDDEAAAHVYDTIRGLGLELSHC  
RFYPGENGYAEVRLDNGDRVFIGSNRGGVSREHPLELTAMDRAIYAGYDIVHTSIFSYIEDELPLIRQAS  
SFVSMDFSDRADEEYLRQCAPYVDCASISCGNMPRSEIEKQMTLIRKFGCRHIVIAIRGAKGALVMVDGR  
LYEQSPCLVEAVDTMGAGDSFITCFLINYVDAMKDSRDFPSASGKGTVTAADYQDLAVRTSLYRAAVYS  
AGNCQKEGSFG

>FraDClostridium\_clostridioforme\_90B1

MLRVLGLGDNVVDKYMHIRTMYPGGNALNFAVYAKMFGMEAGYLGVF GDDEAAAHVYDTIRGLGLELSHC  
RFYPGENGYAEVRLDNGDRVFIGSNRGGVSREHPLELTAMDRAIYAGYDIVHTSIFSYIEDELPLIRQAS  
SFVSMDFSDRADEEYLRQCAPYVDCASISCGNMPRSEIEKQMTLIRKFGCRHIVIAIRGAKGALVMVDGR  
LYEQSPCLVEAVDTMGAGDSFITCFLINYVDAMKDSRDFPSASGKGTVTAADYQDLAVRTSLYRAAVYS  
AGNCQKEGSFG

>FraDClostridium\_clostridioforme\_90A8

MLRVLGLGDNVVDKYMHIRTMYPGGNALNFAVYAKMFGMEAGYLGVF GDDEAAAHVYDTIRGLGLELSHC  
RFYPGENGYAEVRLDNGDRVFIGSNRGGVSREHPLELTAMDRAIYAGYDIVHTSIFSYIEDELPLIRQAS  
SFVSMDFSDRADEEYLRQCAPYVDCASISCGNMPRSEIEKQMTLIRKFGCRHIVIAIRGAKGALVMVDGR  
LYEQSPCLVEAVDTMGAGDSFITCFLINYVDAMKDSRDFPSASGKGTVTAADYQDLAVRTSLYRAAVYS  
AGNCQKEGSFG

>FraDClostridium\_bolteae\_ATCC\_BAA-613

MLRVLGLGDNVVDKYMHIRTMYPGGNALNFAVYAKMFGIEAGYLGVF GDDEAAAHVYDTIRGLGLELSHC  
RFYPGENGYAEVRLDNGDRVFIGSNKGGVSREHPLELTAMDRAIYAGYDIVHTSIFSYIEDELPLLRQAS  
SFVSMDFSDRADEEYLRQCAPYVDCASISCGDMPRSEIEKQMTLIRKFGCRHIVIAIRGAKGALVMVDGR  
LYEQSPCLVEAVDTMGAGDSFITCFLINYVDAMKDSRDFPAASGKGTVTAADYQDLAVRTSLYRAAVYS  
AGNCQKDGSGF

>FraDClostridium\_bolteae\_90B8

MLRVLGLGDNVVDKYMHIRTMYPGGNALNFAVYAKMFGIEAGYLGVF GDDEAAAHVYDTIRGLGLELSHC  
RFYPGENGYAEVRLDNGDRVFIGSNKGGVSREHPLELTAMDRAIYAGYDIVHTSIFSYIEDELPLLRQAS  
SFVSMDFSDRADEEYLRQCAPYVDCASISCGDMPRSEIEKQMTLIRKFGCRHIVIAIRGAKGALVMVDGR  
LYEQSPCLVEAVDTMGAGDSFITCFLINYVDAMKDSRDFPAASGKGTVTAADYQDLAVRTSLYRAAVYS  
AGNCQKDGSGF

>FraDClostridium\_bolteae\_90A5

MLRVLGLGDNVVDKYMHIRTMYPGGNALNFAVYAKMFGIEAGYLGVF GDDEAAAHVYDTIRGLGLELSHC  
RFYPGENGYAEVRLDNGDRVFIGSNKGGVSREHPLELTAMDRAIYAGYDIVHTSIFSYIEDELPLLRQAS  
SFVSMDFSDRADEEYLRQCAPYVDCASISCGDMPRSEIEKQMTLIRKFGCRHIVIAIRGAKGALVMVDGR  
LYEQSPCLVEAVDTMGAGDSFITCFLINYVDAMKDSRDFPAASGKGTVTAADYQDLAVRTSLYRAAVYS  
AGNCQKDGSGF

>FraDClostridium\_bolteae\_90B7

MLRVLGLGDNVVDKYMHIRTMYPGGNALNFAVYAKMFGIEAGYLGVF GDDEAAAHVYDTIRGLGLELSHC  
RFYPGENGYAEVRLDNGDRVFIGSNKGGVSREHPLELTAMDRAIYAGYDIVHTSIFSYIEDELPLLRQAS  
SFVSMDFSDRADEEYLRQCAPYVDCASISCGDMPRSEIEKQMTLIRKFGCRHIVIAIRGAKGALVMVDGR  
LYEQSPCLVEAVDTMGAGDSFITCFLINYVDAMKDSRDFPAASGKGTVTAADYQDLAVRTSLYRAAVYS  
AGNCQKDGSGF

>FraDEnterococcus\_faecium\_R497

MKIDEGDRIFLGSNSGGVTREYPIQLTEEDREYLNQFELIHMGLYSHVNHLLLEELQNVSGKISYDFSDDF  
TEEEVQRAIDKVDGFFSIEDFSDEEVKQFLMKHFCERNVLIATRGEKTAIGYDGAKFYEVNPNVLEEPV  
DTMAAGDSFLTAFLLYFLEGDDIVTAMKKGNEFAGKSCLVDGSGF

>FraDEscherichia\_hermannii\_NBRC\_105704

NIKVIIGIDNVVDKYLHSGVMYPGGNALNFAVYARLAGLES AFLGAFGDDAAARHVQDALRELQVDIQRC  
RHYPGENGYACIRLVEGDREFVTSNKNKGLREHPLQLSEDDLNYIGGFHAVHSSINGFLESQLEKIKQRN  
VTLSFDFSGRGTDDYFKQVCPWVDYGFISCSGALSVEETVNKIYRIYDYGCKHVIATRGEKVVYAGDDI  
IEWQPVIQPVDTLGAGDAFLTGFMLAILSCGNPQPEREDILRAMVAGGKSASQVLHHYGAFG  
>FraDCitrobacter\_rodentium\_ICC168  
SISVIIGIDNVVDKYLHSGIMYPGGNALNFSVYAKRAGVPAAFMGAFGNDDAAKHVQAVLKELEIDTRHC  
RQYEGENGYACIRLKNKGDREFVTSNKNKGLRENPFCLSAEELDYISHFSLVHTSINGYLETELEKISRSN  
TVISFDFSSRGTGDYFEQVCPWVNYGFISCSGLTLDQIKEKISTLHRCGCQHVIATNGHECVYFSSANGF  
LQWRPDYIEPVDTLGAGDAFLTGFMLSVLQSGMRDPDHDAVMTAMQTGGKFSARVLSHYGAFG  
>FraDCitrobacter\_freundii\_GTC\_09629  
SISVIIGIDNVVDKYLHSGVMYPGGNALNFSVYAKLTGVPAAFMGVFGDDEAARHVQDVLHELKIDTTHC  
RHYAGENGYACIRLKNKGDREFVTSNKNKGLREHPLILSQDDLHYISQFNLVHSSINGFLEPELKKIKQNN  
NIISYDFSGRGTDEYFESVCPWISYGFISCSGLSSDEIKEKIEKIYHYGCRHVIATRGEHVYFSSANGY  
LEWHPQYIEPVDTLGAGDAFLTGFMLSILQSGTEEPDNEMVMSAMRVGGQSAQVLSHYGAFG  
>FraDSalmonella\_bongori\_NCTC\_12419  
SISVLGIGDNVVDKYLHSGIMYPGGNALNFSVYAKLVDIPSAFMGAFGNDDAAQHVQDVLHQLQIDISHC  
RYYAGENGYACIRLNNKGDREFVTSNKNKGLREHPFRLTDSLRYISQFTLVHSSINGHLESELEKIKQQN  
VLLSDFDFSWRGTDEYFEKVCWVDYGFISCSGLSTDEIKAKTSQLYHYGCRHIIATCGHDKVYFSSGKEY  
LEWQPDYIEPVDTLGAGDAFLTGFLLSIVQSGMAQPKASVLHAMQQGGKSAQVLSHYGAFG  
>FraDSalmonella\_LT2  
SISVLGIGDNVVDKYLHSGIMYPGGNALNFAVYAKLADIPSAFMGAFGNDDAAQHVQDVLHQLQIDISHS  
RHYTGGENGYACIRLSHGDRQFVASNKNKGLREHPFSLSDDDLRYISQFTLVHSSINGHLESELEKIKQQT  
VLLSDFDFSGRGTDDYFEKVCWVDYGFISCSGLSPDEIKVKNLKYRYGCRHIIATCGHEKVVYFSGADY  
LEWQPAYIEPVDTLGAGDAFLTGFLLSILQSGMAEPDKESVLRAMRQGGKSAQVLSHYGAFG  
>FraDSalmonella\_enterica\_subsp.\_enterica\_serovar\_Typhimurium\_str.\_1402  
85  
SISVLGIGDNVVDKYLHSGIMYPGGNALNFAVYAKLADIPSAFMGAFGNDDAAQHVQDVLHQLQIDISHS  
RHYTGGENGYACIRLSHGDRQFVASNKNKGLREHPFSLSDDDLRYISQFTLVHSSINGHLESELEKIKQQT  
VLLSDFDFSGRGTDDYFEKVCWVDYGFISCSGLSPDEIKVKNLKYRYGCRHIIATCGHEKVVYFSGADY  
LEWQPAYIEPVDTLGAGDAFLTGFLLSILQSGMAEPDKESVLRAMRQGGKSAQVLSHYGAFG  
>FraDSalmonella\_enterica\_enterica\_sv.\_Typhimurium\_LT2-4  
SISVLGIGDNVVDKYLHSGIMYPGGNALNFAVYAKLADIPSAFMGAFGNDDAAQHVQDVLHQLQIDISHS  
RHYTGGENGYACIRLSHGDRQFVASNKNKGLREHPFSLSDDDLRYISQFTLVHSSINGHLESELEKIKQQT  
VLLSDFDFSGRGTDDYFEKVCWVDYGFISCSGLSPDEIKVKNLKYRYGCRHIIATCGHEKVVYFSGADY  
LEWQPAYIEPVDTLGAGDAFLTGFLLSILQSGMAEPDKESVLRAMRQGGKSAQVLSHYGAFG  
>FraDSalmonella\_enterica\_subsp.\_enterica\_serovar\_Enteritidis\_str.\_P125  
109  
SISVLGIGDNVVDKYLHSGIMYPGGNALNFAVYAKLADIPSAFMGAFGNDDAAQHVQDVLHQLQIDISHS  
RHYTGGENGYACIRLSHGDRQFVASNKNKGLREHPFSLSDDDLRYISQFTLVHSSINGHLESELEKIKQQT  
VLLSDFDFSGRGTDDYFKKVCWVDYGFISCSGLSPDEIKIKLKNLKYRYGCRHIIATCGHEKVVYFSGADY  
LEWQPAYIEPVDTLGAGDAFLTGFLLSILQSGMAEPDKESVLRAMRQGGKSAQVLSHYGAFG  
>FraDSalmonella\_enterica\_subsp.\_enterica\_serovar\_Paratyphi\_C\_str.\_RKS4  
594  
SISVLGIGDNVVDKYLHSGIMYPGGNALNFAVYAKLADIPSAFMGAFGNDDAAQHVQDVLHQLQIDISHS  
RHYTGGENGYACIRLSHGDRQFVASNKNKGLREHPFSLSDDDLRYISQFTLVHSSINGHLESELEKIKQQT  
VLLSDFDFSGRGTDDYFEKVCWVDYGFVSCSGLSPDEIKIKLKNLKYRYGCRHIIATCGHEKVVYFSGADY  
LEWQPAYIEPVDTLGAGDAFLTGFLLSILQSGMAEPDKESVLRAMRQGGKSAQVLSHYGAFG  
>FraDLM\_ORIG\_scaffold\_17  
MAKYNTKVLGFGDNVVDLYEHSMMYPGGNCVNLCAYSKMFVERAAYMGYFGSDAIAEFVISVLHELEI  
ETVKCRQLVGENGWSKCTLVDGDRIFGDYNEGGVRGKNPYILDRFDLEYMKQFDFVHTGNICYTESQLKT

MKEAGIKVSFDFSDSSREYYEKYAPFVTYAFCSFNGDDEAAKEHLRFVHSLGPELVSLTRGSKGCLMYD  
GEEFYVQPATMIEHVVDTMGAGDSFLTSFMDCYIDQVKRGTDKPEAIRISLAEASKFAAHVCTLDGAFGY  
GKPYEDK\*

>FraDLM\_ORIG\_scaffold\_39

MVKVLGLGDNVCDVYLHTGVMYPGGQAVNFAVFARELGAEADFMGVFGMDAVAHAHVQESLRKRGVGTCHC  
RCYEGENAFARVTLVDGDRVFRGSNRGGVLQQHPIYLDEADLAYADAFDLIHTTNGFIDGLLPALRELR  
PLISYDFSYRWNEEDRVDRVCPYIDFGFLSCSDLGDEETEALCRRLCDKGCVVATRGSKGATVYDGSQ  
FYSQLPDYVTPIDTMGAGDSFATAMLVTLQSMKQGRDWDWENSILRAYLLPGALKAAAAFSARTCLVNG  
AFGGGAAPESLRARLYGES\*

>FraDLM\_ORIG\_scaffold\_211

MRVIGIGDNVCDKYVHQTMYPGGQALNFAVYARMLGVESAYLGVFGSDEVAHAHVQRQLDRRGVDRSRR  
QYEGENGCARVSLVNGDRVFLGNSNRGGVLRHLELDGEDLAYIGGFDLCHTTNNSYMDEQLPRLREAGV  
PVSYDFSGQWTEARVERVAPHVDYAFLSCGSVSLEQAQDICRRMQGAGAGMVIATRGSAGAVLFDGQDF  
YLRPPQLVEAVDTLGGAGDSFATAFLLSWRAGQLEHGEMDSALRARLLEGALERAAGFSAQTCLVCGAFG  
EGKAYDPEQDG\*

>FraDLM\_ORIG\_scaffold\_458

MTDCYVDEGVYFPGGNAVNVAVNCKKNGAARVNYIGVFGDDDRADYIKECLTEEGVEFLRSRQVCAHTAQ  
PRVYLKDGDRVFGPGPRDSCQHLFAIKLVTEMDLIREFDICHTSCYSNLEYELPALSRIQVDFDFSDK  
RDDAYLERVCPYLTFAFFSGSDLEKDRQALLRKARELGVKIAGITRGAKGAIFYDGENFYHQGIKETE  
VDTMGAGDSFIAGFLTAYGDKKPIKEALDYAACRSALTCTVRGGFGHPHKA\*

>FraDLM\_ORIG\_scaffold\_551

MRASKIIGIGIATMDIYCHQKRMYPGGNEYNIAYNAKLLGADAAFMGVFANDMAGRILEQTLVDAGVDT  
HSHHESGSSGYALVDLKDGRVFLDWNKQGVTDLYPFVFTEEEIAYIKTDFVSCISWGARVNRDRLKLA  
AAGVTVCYDFYDNFTDEDIMGISPYIQYGFSCSHISEEEAKAVLKKCIESGCKIAVATRGEATVAYDG  
ENYYYQEICRVRPKDTMGAGDSFISAFMLNYLSAGADGSSAGDKITASLKEAAKYAAAVIVKDGSLGVGY  
DVNPDRLSEIINL\*

>FraDLM\_ORIG\_scaffold\_593

MKVIGIGDNVCDKYVHLKTMFPGGQALNFAVYAKMLGADASYMGVFGRDEVADHVLTTLDLLQVEHGRCR  
QYEGENGFASVTLVEGDRVFLGNSNRGGAAREHLELTEEDLAYIRGFVSHVHTSNNSYFNSQLAKVKSTGV  
SLSYDFSGRWRDEAFVAQAAPYADYAFLSCGSAPLEEAQEVCRRLCAAGCGRVIATRGSAGALYYDGADF  
FQPPDPVEPVDTLGGAGDSFATAFLLSFLESLEAGERMAADRPLYEEVRAALRRGAFAAKTCLVQGA  
FGHGKAFLPE\*

>FraDLM\_ORIG\_scaffold\_634

MIKVLGIGDNVCDKYLHRKIIYPGGNALNIAVFGKFMGAETAYLGTLDGDEEVGQHVYSVVRGLGIDL  
RMEEGENGCARVRLVNGDRVFLGNHGGIARTKPPVLTKLDESYIAGFDLVHTSIYSYMEPELPLKRRAG  
KFVSMDFSNHYDEAYLKQCCPYLDCAEISCGDMDEEEMHQTMEIISLGCKHMVIATRGSKGACVLVNGK  
FYEQSSQLVQARDTMGAGDSFITSFLIHYLDGIRDAVDFSEESGERGIVSAAEYQDILIRLCLYRAAVFA  
SGQCQRDGSFSGFKEVELTDQDVEVMEGNKALKF\*

>FraDLM\_ORIG\_scaffold\_1033

MARYDVSVLFGDNVVDKYEHIKTMYPGGNAVNFVFAKQLGAARSAYMGI FGSQDQEAHVSISSLTEEGI  
ELIECRQVIGENGAARVTVEAGTGDRIFLGSNEGGIRGDMLFALDRFTMEYVRGFDLVHSGNYCFTEREL  
PKIKAAGVPISFDFSDSTDEYFERIAPLVDFAFMSCGDMTLEETKAKLQKVSQLGPRFVCASRGSEGS  
IAYDGKEFYVQGIKPVENMVDMAAGDSLLAAFLVSYLSLEKQKGGPEAIRTCLDEAAAFATHTCGLAGS  
WGHGKEYE\*

>FraDLM\_ORIG\_scaffold\_1182

MKLAAVGNSCIDYYENMEGGKAYPGGGPVNMAVYTVRLGGEASYIGPVGTDLYGGIMREAIRNKGVDISR  
LQVKEGRTAVSQVTLTDGERVFGDYDEGMADYVLSEEDMDFICAHDVVCDLWGKVEGQFKDLKERGMT  
TAFDCATRPEDPESQTAMPYTDYLLFSCDDGDTPELRAQMCRYHEKGPRLVVCMMGSDGSLCWDGREFHR  
FGIVPCENLVDSMGAGDSYIAGFLLGITEGLPIEEAMEKGAANATVTLGYFGGW\*

>FraDLM\_ORIG\_scaffold\_2447



MVKVLGLGDNVCDVYLHTGMTYPGGQAVNFAVYAGQLGAQADFMGVFGGDAVARHVQSTLDEKGVGRSHC  
RSYPGENGFARVTLVEGDRVFMGSNRGGVLQEHPIYLDQADLDYIAGFDLVHTTNGFVDSLLPQLSQLP  
PFVSYDFSRYWNEEDRVERVCPYIDFAFLSCSLDDVQTQDLCRRLHEKGCVVATRGSKGATVFDGSR  
FYEQSPHLVEPVDTMGAGDSFATAMLTSLQLALEREGRNAWSWESFRSNALPQALDKAAAFSARNCLVHG  
AFGCGVPVPEELRPRMYEGIQ\*

>FraDLM\_ORIG\_scaffold\_2639

MNMAAIGFCCIDVYENIGKRYATGNGVDCIVHLARRGVETALVSVIGSDEYGKEMLELCREYKIDTAHLQ  
VREGKTSVYRMALKNGVDRVHVENIPGVMADYTPTQSDLEFVKGFYVHTDLTGRVLHLLPELYEAGCKI  
IFDFSMNKEEENLKQILPYVHCAFFSCEKKQPEIKDFLKKAKALGAKYVVATFGEEGSMCYDGEKFCEQG  
IYKVPVNTVGAGDSFIAGFSWGLMCGKDVVEECLEEGARLSSWVQGFNPY\*

>FraDLM\_ORIG\_scaffold\_3412

MATEPRHIRIIAIGDNVCDKYL SRGKMYPGGQCVNTCAYVRMNGLEAAYLGKFGDDEVAACNRETLAKLD  
IDTSHCRSFPGENGFALVTLQGS DRVFLG SNKGGIAKEHPFAFTQEDLRYISGFSLIYTNLNSYIEEDLP  
LLAKTGVPIAYDFSLRWTDEYLARVAPYVTVAILSCAHLTPEEREREMKKAQAHGISIVLGTIGEEGSWV  
LYRDNFYVTMAVRAEDVIDTMGAGDSYFAAFLCSLLSDSASGALIEDEEEMAARLKRAMNKGAAFAAKV  
CAMEGAFGYGVPITGRTQL\*

>FraDLM\_ORIG\_scaffold\_4469

MKEVRILAIGDNVCDKYL SRGKMYPGGQCVNTCAYARMNQTEAAYLGKFGSDEVAAYNQEILARLGIDAS  
RCRRFPGENGFALVTLRGNDRVFLG SNKGGVAKEHPFSFTPEDLDYIRGFSLIYTNLNSYIEEDLPLKE  
TGVPIAYDFSLRWND EYLAKVAPYVTVAILSCAHLTPEEREREMKKAQSHGIAIVLGTIGEEGSWVLYGD  
RFYYPAPVAHAEDVIDTMGAGDSYFAAFLCSLLRDSATGALIEGDEAEMAARLQRAMNRGAAFAAQVCAME  
GAFGYGTPIILGRTEV\*

>FraDLM\_ORIG\_scaffold\_4493

MGSYQVSVLGF GDNVVDKYEHIKTMYPGGNAVNF AVFAKQLGAQRSAYMGI FGSDQEAHV IASLQEEGV  
ELAKCQQVVGPNGAARVTVEEGTGDRIFLGSNEGGIRGDMFLVLD RFTLEYVKGF DLVHSGNYCF TEREL  
PKIKAAGVPISFDFSDSTDEY YERIAPLVDYAFMSCGDMTPEETRKRLEKVAALGPKFVCASRGSEGC I  
AYDGKEFYEQGIRPVEHLVD TMAAGD SLLTAFLVEYVDM EKQKGKGPDAIRACLYDAAGLASHTCGLAGS  
WGHGKVYD\*

>FraDLM\_ORIG\_scaffold\_6500

MRVIGIGDNVCDKYEHQKTMYPGGQALNFSIYARMLGVESAYIGVFGTDEVAQHVM AALDKYQVDRSRCR  
QYEGENG CARVTLVDGDRVFLG SNKGGVLRDHP IELGDVDLNYIKQFALCHTSNNSYMSQLPRLKQAGI  
SVSYDFSGQWDAER VERVAPCIDYAF LSCGGAAPQETAADICRMINGKGTGMVIATR GSEGAMLYDGTD  
FYTQPPKLV EAVDTLGAGDSFAAFL LLAWLKRKDRAEQDPSIRPAVLREALEQAAEFSSKTCLVYGAFGE  
GTA FEPMGKGEA\*

>FraDLM\_ORIG\_scaffold\_6921

MKIAGIGDNVIDRYINRGVIFPGGNAVNVAAHA AKLGAGAAVYVGSIGADREGRIVKEALKTLEVDLSQCI  
FEQGT TTKRCDVNVYD GERSYIGTDTGNNWAHMKEIRD RDLEYL KDFQVIHTSCNAKLHQDIYRLKDLKG  
MVTDFDFSEKEKYSKEFLAVVCPYLEL GQF SCTGM EEEQIGRLLAVHEL GCKNAVATMGSSQIFYNGE  
VFVRGQACYVKPLDTMGAGDSFLAALLV TLLKSGWEK GARLSPDVINTALKEAARYSAENCMAEGGF GFK  
HRI\*

>FraDLM\_ORIG\_scaffold\_6947

MTDCYVDEGVYFPGGNAVNVAVNCKKNGAEKVNYIGVFGD DERADYIKECLAKEGV EFKRSR KVC AHTAQ  
PRVYLKDGDRVFGPGPRDSCQHLFSIKIVAEDMEVIRDFD ICHTSCFSNLEYELPAISEICQVSDFSER  
REEDYLKRTCPYLTF AFFSGSEMEERECEELLKKVHGLG TKVVGITRGSKGAI FYDGEKIYRQGIKPV E  
VDTMGAGDSFIAGFLTAYGDGKT MEEALDYGAERS SRTCMVRGGFGYPHKA\*

>FraDLM\_ORIG\_scaffold\_8780

MLVTERAAELRLANACLG IKYQAGLFYRMEGTMIRVLGIGDNVCDHYLHTGMIY PGGNALNVA VFGGFLG  
AEAAYLGTFGDDEIGRHVYSVIRELGIDISHCRMEEGENG CARVQLVDGERVFLPGNQGGIAGAKPPVLS  
KLDEAYISGFDLIHTSIFSHMEPEL PKIRRVGK FVSMDFSDRYDEDYLRCCPYIDCGEISCGDMDEKEI  
RQIMDQIMKFGCKHMVIATRGSKGAYVLADG SFYEQSPCLVKAKDTMGAGDSFIASFLVNYLDGISM AVD

FPEKSGRGLVTAEGYKDALIRVSLYRAAVFSSCQCQRDGSFGHGKPVQRWAEGDAMEE\*

>FraDL0\_ORIG\_scaffold\_34

MVKVLGLGDNVCDVYLHTGVMYPGGQAVNFAVFARELGAEADFMGVFGMDAVAHVQESLRKRGVGC  
RCEGENAFARVTLVDGDRVFRGNSRGGVLLQHPHLYLDEADLAYADAFDLIHTTNGFIDGLL  
PALRELRPLISYDFSYRWNEEDRVDRVCPYIDFGFLSCSDLGDEETEALCRRLCDKGC  
GVVATRGSKGATVYDGSQFYSQLPDYVTPIDTMGAGDSFATAMLVTLQSM  
EKQGRTDWENSILRAYLLPGALKAAAAFSARTCLVNGAFGGAAVPE  
SLRARLYGES\*

>FraDL0\_ORIG\_scaffold\_315

MAKYNTKVLGFGDNVVDLYEHSMMYPGGNCVNLCAYSKMF  
GVERAAYMGYFGSDAIAEFVISVLHELEIETVKCRQLV  
GENGWSKCTLVGDRIFGDYNEGGVGRKNPYILDRFDLE  
YMKQFDFVHTGNICYTESQLKTMKEAGIKVSFDFSD  
SSREYYEKYAPFVTYAFCSFNGDDEAAKEHLRFVH  
SLGPELVSLTRGSKGCLMYDGEFYVQPATMIEHV  
VDTMGAGDSFLTSFMDCYIDQVKRGTDKPEAIRIS  
LAEASKFAAHVCTLDGAFGYGKPYEDK\*

>FraDL0\_ORIG\_scaffold\_504

MTDCYVDEGVYFPGGNAVNVAVNCKKNGAARVNYIG  
VFGDDDRADYIKECLTEEGVEFLRSRKAHTAQPR  
VYLKDGDRVFGPGPRDSCQHLFAIKLVTEDMDLIRE  
FDICHTSCYSNLEYELPALSRICQVSFDFSDKR  
DDAYLERVCPYLTFAFFSGSDLEKDRCAALLRKARE  
LGVKIAGITRGAKGAIIFYDGENFYHQGIKETE  
VDTMGAGDSFIAGFLTAYGDKKPIKEALDYAACRS  
ALTCTVRGGFGHPHKA\*

>FraDL0\_ORIG\_scaffold\_585

MKVIGIGDNVCDKYVHLKTMFPGGQALNFAVYAKML  
GADASYMGVFGRDEVADHVLTLLDQLQVEHGRCR  
QYEGENGFASVTLVEGDRVFLGNSRGGAREHPLE  
LTEEDLAYIRGFVHTSNNSYFNSQLAKVKSTGV  
SLSYDFSGRWRDEAFVAQAAPYADYAFSLCSGSA  
PLEEAQEVCRRLCAAGCGRVIATRGSAGALYDGA  
DFEQPPDPVEPVDTLGGAGDSFATAFLLSFLES  
LERAGERMAADRPLYEEEVRAALRRGAFAAKTCL  
VQGAFGHGKAFLPE\*

>FraDL0\_ORIG\_scaffold\_688

MIKVLGIGDNVCDKYLHRKIIYPGGNALNIAVFGK  
FMGAETAYLGTLDGDEVGQHVYSVVRGLGIDLS  
HCRMEEGENGCARVRLVNGDRVFLGNHGGIARTK  
PPVLTKLDESUYIAGFDLVHTSIYSYMEPELPL  
KRRAGKFVSMDFSNHYDEAYLKQCCPYLDCAEIS  
CGMDDEEEMHQTMEEIISLGCKHMVIATRGS  
KGACVLVNGKFYEQSSQLVQARDTMGAGDSFITS  
FLIHYLDGIRDAVDFSEESGERGIVSAAEYQD  
ILIRLCLYRAAVFASGQCQRDGSFGFGKEVEL  
TDQDVEVMEGNKALKF\*

>FraDL0\_ORIG\_scaffold\_1461

MKLAAVGNSCIDYYENMEGGKAYPGGGPVNMAV  
YTVRLGGEASYIGPVGTDLGGIMREAIRNKGV  
DISRLQVKEGRTAVSQVTLTDGERVFGDYDEG  
VMADYVLSEEDMDFICAHDVVCDLWGKVEGQ  
FKDLKERGMTAFDCASTRPEDPESQTAMPYTD  
YLFSCDDGDTPELRAQMCRYHEKGPRLVVC  
MMGSDGSLCWDGREFHRFGIVPCENLVDSM  
GAGDSYIAGFLLGITEGLPIEEAMEKGAANAT  
VTLYYFGGW\*

>FraDL0\_ORIG\_scaffold\_1593

MNMAAIGFCCIDVYENIGKRYATGNGVDCIVH  
LARRGVETALVSVIGSDEYKEMLELCREYKID  
TAHLQVREGKTSVYRMALKNVDRVHVENIPG  
VMADYTPQTSDLEFVKGFYVHTDLTGRV  
LHLLPELYEAGCKIIFDFSMNKEEENLKQIL  
PYVHCAFFSCEKKQPEIKDFLKKAKALGAKY  
VVATFGEESMICYDGEKFCEQGIYKVPV  
VNTVGAGDSFIAGFSWGLMCGKDVEECLE  
EGARLSSWVVQGFNPY\*

>FraDL0\_ORIG\_scaffold\_2136

MVKVLGLGDNVCDVYLHTGTMYPGGQAVNFAV  
YAGQLGAQADFMGVFGGDAVARHVQSTLDEK  
GVGRSHCRSYPGENGFARVTLVEGDRVFMG  
SNRGGVLLQEHPIYLDQADLDYIAGFDLVHT  
TNGFVDSLLPQLSQLPFFVSYDFSYRWNE  
EDRVDRVCPYIDFAFLSCSLDDVQTQDL  
CRRLHEKGCVVATRGSKGATVFDGSRFYE  
QSPHLVEPVDTMGAGDSFATAMLSLLQAL  
EREGRNAWSWESFRSNALPQALDKAAAF  
SARNCLVHGAFGCGVPVPEELRPRMYEGIQ\*

>FraDL0\_ORIG\_scaffold\_2583

MKEVRILAIGDNVCDKYLRSRGMYPGGQCVNT  
CAYARMNQTEAAYLGKFGSDEVAAYNQEIL  
ARLGIDASRCRRFPGENGFALVTLRGNDRV  
FLGNSKGGVAKEHPFSFTPEDLDYIRGFSL  
IYTNLNSYIEEDLPLLKETGVPIAYDFSL  
RWNDEYLAKVAPYVTVAILSCAHLTPEER  
EREMKKAQSHGIAIVLGTIGEEGSWVLYGD

RFYYAPAVHAEDVIDTMGAGDSYFAAFLCSLLRDSATGALIEGDEAEMAARLQRAMNRGAFAAAQVCAME  
GAFGYGTPIILGRTEV\*

>FraDLO\_ORIG\_scaffold\_2686

MGSYQVSVLGFQDNVVDKYEHIKTMYPGGNAVNFVFAKQLGAQRSAYMGI FGSDQEAHVIA SLQEEGV  
ELAKCQQVVGPNGAARVTVEEGTGDRIFLGSNEGGIRGDMFLVLD RFTLEYVKGF DLVHSGNYCFTEREL  
PKIKAAGVPISFDFSDSTDEYYERIAPLVDYAFM SCGDMTLEETRKRLEKVAALGPKFVCASRGSEGC I  
AYDGKEFYEQGIRPVEHLVDTMAAGDSLLTAFLVEYVDM EKQKGKGPDAIRACLYDAAGLASHTCGLAGS  
WGHGKVYD\*

>FraDLO\_ORIG\_scaffold\_4979

MKLAAVGNSCIDFYSNIEGGKAYPGGGPVNMAVYTVRLGGQSSYTGPVGDDEF GAIMREAI AAKGVDISH  
LHTESGKTAVSQVELLDGERVFGDYDEGVLESYRLSEADMDFICTHDVVVCDLWGKVEGQFPELQRRGIK  
TAFDCADRPEDEASQVAMPHSDYLFFSSEAGDTAALRDQMKGYSRGPKLVIAM LGEHGS LCYDGKEFHK  
FGIVPCDKVVDTMGAGDSYIAGFLLGITDGLTIDQAMEKGAANATETLKYFGAW\*

>FraDLO\_ORIG\_scaffold\_6866

MLVTERAAELRLANACLGIKYQAGLFYRMEGTMIRVLGIGDNVCDHYLHTGMIYPPGGNALNVA VFGGFLG  
AEAAYLGTFGDDEIGRHVYSVIRELGIDISHCRMEEGENGCARVQLVDGERVFLPGNQGGIAGAKPPVLS  
KLDEAYISGFDLIHTSIFSHMEPELPIKIRRVGK FVSMDFSDRYDEDYLRCCPYIDCGEISCGDMDEKEI  
RQIMDQIMKFGCKHMVIATRSGKAYVLADGSFYEQSPCLVKAKDTMGAGDSFIASFLVNYLDGISM AVD  
FPEKSGRGLVTAEGYKDALIRVSLYRAAVFSSCQCQRDGSFGHGKPMQRWAEGDAMEE\*

>FraDLO\_ORIG\_scaffold\_12091

CHTTNNSYMDEQLPRLREAGVPVSYDFSGQWTD EARVERVAPHVDY AFLSCGSVSLEQAQD ICRRMQGAG  
AGMVIATR GSEGAVLFDGQDFYLRPPQLVEAVDTLGAGDSFATAFLLSWRAGQLEHGEDMDSALRARLLE  
GALERAAGFSAQTCLVCGAFGEGKAYDPEQDG\*

>FraDLP\_ORIG\_scaffold\_34

MVKVLGLGDNVCDVYLHTGVMYPGGQAVNFVFARELGA EADFMGVFGMDAVA AHVQESLRKRGVGCTHC  
RCYEGENAFARVTLVDGDRVFRGSRGGV LQQHPIYLDEADL AYADAFDLIHTTNGFIDGLL PALREL R  
PLISYDFSYRWNEEDRVDRVCPYIDFGFLSCSDLGDEETEALCRRLCDKGC GVVTATRGSKGATVYDGSQ  
FYSQLPDYVTPIDTMGAGDSFATAMLVTL LQSM EKQGR TDWENSILRAYLLPGALKAAA AFSARTCLVNG  
AFGGGAAPESLRARLYGES\*

>FraDLP\_ORIG\_scaffold\_242

MAKYNTKVLGFGDNVVDLYEHSMMYPGGNCVNLCAYSKMFGVERAAYMGYFGSDAIAEFVISVLHELEI  
ETVKCRQLVGENGWSKCTLVGDRIFGDYNEGGVRGKNPYILDRFDLEYMKQFDFVHTGN YCYTESQLKT  
MKEAGIKVSFDFSDSSREYYEKYAPFVTYAFCSFN GDDEAAKEHLRFVHSLGPELVSLTRGSKGCLMYD  
GEEFYVQPATMIEHVVDTMGAGDSFLTSFMDCYIDQVKRGTDKPEAIRISLAEASKFAAHVCTLDGAFGY  
GKPYEDK\*

>FraDLP\_ORIG\_scaffold\_427

MRVIGIGDNVCDKYVHQSTMYPGGQALNFVYARMLGVESAYLGVFGSDEVA AHVRQTLDRRGVDRS RCR  
QYEGENGCARVSLVNGDRVFLGSRGGV LREHPLELDGEDLAYIGGFDLCHTTNNSYMDEQLPRLREAGV  
PVSYDFSGQWTD EARVERVAPHVDY AFLSCGSVSLEQAQD ICRRMQGAGAGMVIATR GSEGAVLFDGQDF  
YLRPPQLVEAVDTLGAGDSFATAFLLSWRAGQLEHGEDMDSALRARLLEGALERAAGFSAQTCLVCGAFG  
EGKAYDPEQDG\*

>FraDLP\_ORIG\_scaffold\_519

MTDCYVDEGVYFPGGNAVNVAVNCKKNGAARVNYIGVFGDDDRADYIKECLTEEGVEFLRSR KVCAHTAQ  
PRVYLKDGDRVFGPGPRDSCQHLFAIKLVTEMDLIREFDICHTSCYSNLEYELPALS RICQVSFDFSDK  
RDDAYLERVCPYLTFAFFSGSDLEKDR CQALLRKARELGVKIAGITRGAKGAI FYDGENFYHQGIKETE V  
VDTMGAGDSFIAGFLTAYGDKPIKEALDYAACRSALTCTVRGGFGHPHKA\*

>FraDLP\_ORIG\_scaffold\_665

MKVIGIGDNVCDKYVHLKTMFPGGQALNFVYAKMLGADASYMGVFRDEVADHVLTTLDLLQVEHGRCR  
QYEGENGFASVTLVEGDRVFLGSRGGAAREHPLEL TEEDLAYIRGF SHVHTSNNSYFNSQLAKVKSTGV  
SLSYDFSGRWRDEAFVAQAAPYADY AFLSCGSAPLEEAQEVCRRLCAAGCGRVIATRGSAGALYYDGADF

FQPPDPVEPVDTLGAGDSFATAFLLSFLESLEAGERMAADRPLYEEEEVRAALRRGAFAAKTCLVQGA  
FGHGKAFLPE\*

>FraDLP\_ORIG\_scaffold\_731

MIKVLGIGDNVCDKYLHRKIIYPPGGNALNIAVFGKFMGAETAYLGTLDGDEEVGQHVYSVVRGLGIDL  
RMEEGENGCARVRLVNGDRVFLGNHGGIARTKPPVLTKLDESYIAGFDLVHTSIYSYMEPELPLRRAG  
KFVSMDFSNHYDEAYLKQCCPYLDCAEISCGDMDEEEMHQTMEEIISLGCKHMVIATRSGKACVLVNGK  
FYEQSSQLVQARDTMGAGDSFITSFLIHLYLDGIRDAVDFSEESGERGIVSAAEQDILIRLCLYRAAVFA  
SGQCQRDGSFSGFKEVELTDQDVEVMEGNKALKF\*

>FraDLP\_ORIG\_scaffold\_1333

MIRVLGIGDNVCDKYLHRTIYPPGGNALNIAVFGKMLGAEAYLGTFGDDEVGRHVYSVVRNMGIDISHC  
RMEQGENGCARVQLVDGDRVFLQGNKGGISRIKPPVLTQIDQEYISGFDLVHTSIYSFMESELSKIRETG  
KFVSMDFSDSYEEELKCCPYLDCAVISCAGMAEIRKVMKDITEFGCKHMVIATRSGKACVMADGD  
FYEQSPCLVKARDTMGAGDSFITCFLVNYLDGISMAMDFGKDSGVQGIVRAKDYKDMILIRLSLYRAAVFS  
SRQCQRDGSFSGHKAVELSDQDQVMNG\*

>FraDLP\_ORIG\_scaffold\_1817

MNMAAIGFCCIDVYENIGKRYATGNVDCIVHLARRGVETALVSVIGSDEYKEMLELCREYKIDTAHLQ  
VREGKTSVYRMALKNVDRVHVENIPGVMADYTPTQSDLEFVKGFYVHTDLTGRVLHLLPELYEAGCKI  
IFDFSMNKEEENLKQILPYVHCAFFSCEKKQPEIKDFLKKAKALGAKYVVATFGEESMICYDGEKFCEQG  
IYKVPVNTVGAGDSFIAGFSWGLMCGKDVEECLEEGARLSSWVVQGFNPY\*

>FraDLP\_ORIG\_scaffold\_1968

MTDCYVDEGVYFPGGNAVNAVNCCKNGAEKVNIGVFGDDERADYIKECLAKEGVEFKRSRKCVAHTAQ  
PRVYLKGDVRFVGPGRDSCQHLFSIKIVAEDMEVIRDFDICTSCFSNLEYELPAISEICQVSDFSER  
REEDYLKRTCPYLTFAFFSGSEMEERECEELLKVVHGLGTVVGITRSGKAIIFYDGEKIYRQGIKPV  
VDTMGAGDSFIAGFLTAYGDGKTMEEALDYGAERSSRTCMVRGGFGYPHKA\*

>FraDLP\_ORIG\_scaffold\_1969

MKLAAVGNSCIDYYENMEGGKAYPPGGPVNMAVYTVRLGGEASYIGPVGTDLYGGIMREAIRNKGVDISR  
LQVKEGRTAVSQVTLTDGERVFGDYDEGVMADYVLSEEDMDFICAHDVVCDLWGKVEGQFKDLKERGMT  
TAFDCATRPEDPESQTAMPYTDYLFSCDDGDTPELRAQMCRYHEKGPRLVVCMMGSDGSLCWDGREFHR  
FGIVPCENLVDSMGAGDSYIAGFLLGITEGLPIEEAMEKGAANATVTLGYFGGW\*

>FraDLP\_ORIG\_scaffold\_2458

MVKVLGLGDNVCDVYLHTGMTYPGGQAVNFAVYAGQLGAQADFMGVFGGDAVARHVQSTLDEKGVGRSHC  
RSYPGENGFARVTLVEGDRVFMGSNRGGVLQEHPIYLDQADLDYIAGFDLVHTTNGFVDSLLPQLSQLP  
PFVSYDFSRYWNEEDRVERVCPYIDFAFLSCSLDDVQTDLCRRLHEKGCVVATRSGKATVFDGSR  
FYEQSPHLVEPVDTMGAGDSFATAMLSLLQALEREGRNAWSWESFRSNALPQALDKAAAFSARNCLVHG  
AFGCGVPVPEELRPRMYEGIQ\*

>FraDLP\_ORIG\_scaffold\_3016

MKEVRILAIGDNVCDKYLRSRGMYPGGQCVNTCAYARMNQTEAAYLGKFGSDEVAAYNQEILARLGIDAS  
RCRRFPGENGFALVTLRGNDRVFLGSNKGGVAKEHPFSFTPEDLDYIRGFSLIYTNLNSYIEEDLPLLKE  
TGVPIAYDFSLRWNDEYLAKVAPYVTVAILSCAHLTPPEEREREMKKAQSHGIAIVLGTIGEEGSWVLYGD  
RFYYAPAVHAEDVIDTMGAGDSYFAAFLCSLLRDSATGALIEGDEAEMAARLQRAMNRGAFAAQVCAME  
GAFGYGTPILGRTEV\*

>FraDLP\_ORIG\_scaffold\_3029

MGSYQVSVLFGDNVVDKYEHIKTMYPGGNAVNFVFAKQLGAQRSAYMGI FGSDQEAHVIAASLQEEGV  
ELAKCQQVVGPNGAARVTVEEGTDRIFLGSNEGGIRGDMFLVDRFTLEYVKGFDLVHSGNYCFTEREL  
PKIKAAGVPISFDFSDSTDEYYERIAPLVDYAFMSCGDMTLEETRKRLEKVAALGPKFVCASRGSEGC  
AYDGKEFYEQGIRPVEHLVDTMAAGDLSLTAFLVEYVDMKQKGGPDAIRACLYDAAGLASHTCGLAGS  
WGHGKVYD\*

>FraDLP\_ORIG\_scaffold\_3339

MATEPRHIRIIAIGDNVCDKYLRSRGMYPGGQCVNTCAYVRMNGLEAAYLGKFGDDEVAACNRETLAKLD  
IDTSHCRSFPGENGFALVTLQGS DRVFLGSNKGGIAKEHPFAFTQEDLRYISGFSLIYTNLNSYIEEDLP

LLAKTGVPIAYDFSLRWTDEYLARVAPYVTVAILSCAHLTPEEREREMKKAQAHGISIVLGTIGEEGSWV  
LYRDNFYTMAVRAEDVIDTMGAGDSYFAAFLCSLLSDSASGALIEEDEEEMAARLKRAMNKGAFAAKV  
CAMEGAFGYGVPITGRTQL\*

>FraDLP\_ORIG\_scaffold\_3360

MRASKIIGIGIATMDIYCHQKRMYPGGNEYNIAYNAKLLGADAAFMGVFANDMAGRILEQTLVDAGVDT  
HSHHESGSSGYALVDLKDGRVFLDWNKQGVTDLYPFVFTEEIAYIKTFDVSCISWGARVNRDLKLA  
AAGVTVCYDFYDNFTDEDIMGISPYIQYGFSCSHISEEEAKAVLKKCIESGCKIAVATRGHEATVAYDG  
ENYYYQEICRVRPKDTMGAGDSFISAFLMNYLSAGADGSSAGDKITASLKEAAKYAAAVIVKDGSLGVGY  
DVNPDRLSEIINL\*

>FraDLP\_ORIG\_scaffold\_6191

MKLAAVGDNCDVYENIGKAYPGGNPVNAVYFVRLGGEASYTGVVGTDQYGSLMKEKIGEKGVDSHIR  
FEEGSTAITHVDLIDGERVFGDYEEGVLAEFKLTKEEIDFLCSHDLVVTGLWGNIHADLAEIHSRGVKA  
FDAATRPDDEAARIAIPSDYLFFAADDGDTPELRAQMKEIFDRGPKLVITTLGEKGSIVYDGKTYTTFG  
IIPCHVVDTMGAGDSYIAGFLKGILEEKSVEECMKAGASNSSVTLEYNGAW\*

>FraDLP\_ORIG\_scaffold\_7856

MLVTERAAELRLANACLGIKYQAGLFYRMEGTMIRVLGIGDNVCDHYLHTGMIYPPGNALNAVAVFGGFLG  
AEAAYLGTFGDDEIGRHVYSVIRELGIDISHCRMEEGENGCARVQLVDGERVFLPGNQGGIAGAKPPVLS  
KLDEAYISGFDLIHTSIFSHMEPELPIKIRRVGKVFVSMDFSDRYDEDYLRCCPYIDCGEISCGDMDEKEI  
RQIMDQIMKFGCKHMVIATRSGKAYVLADGSFYEQSPCLVKAKDTMGAGDSFIASFLVNYLDGISMVD  
FPEKSGRGLVTAEGYKDALIRVSLYRAAVFSSCQCQRDGSFGHGKPMQRWAEGDAMEE\*
